# Supplementary material for: Identification of novel non-toxic and anti-angiogenic α-fluorinated chalcones as potent colchicine binding site inhibitors
Source: PubMed Central journal article supplement (PMC8741257; doi:10.1080/14756366.2021.2014831), 2022-01-03

# Identification of novel non-toxic and anti-angiogenic $\alpha$ -fluorination chalcones as potent colchicine binding site inhibitors

**Authors:** Moran Sun<sup>b</sup>, Minghua Yuan<sup>b</sup>, Yingying Kang<sup>b</sup>, Jinling Qin<sup>b</sup>, Yixin Zhang<sup>b</sup>, Yongtao Duan<sup>a</sup>, Longfei Wang<sup>\*a</sup>, Yongfang Yao<sup>\*a,b</sup>

**Affiliation:**

- a. Henan provincial key laboratory of children's genetics and metabolic diseases, Children's Hospital Affiliated to Zhengzhou University, Zhengzhou University, Zhengzhou 450018, China
- b. School of Pharmaceutical Sciences, and Institute of Drug Discovery & Development, Zhengzhou University, 100 Kexue Avenue, Zhengzhou, Henan 450001, China.

\*Corresponding authors: yongfangyao@zzu.edu.cn (Yongfang Yao), dragonfly\_wang@163.com (Longfei Wang)

## Supplementary Material

**Contents:**

|                                                                                      |           |
|--------------------------------------------------------------------------------------|-----------|
| <b>1. <sup>1</sup>H, <sup>13</sup>C NMR and HRMS spectra of synthesized products</b> | <b>2</b>  |
| <b>2. Cell arrest western blot assays films of compound 4c(48h)</b>                  | <b>33</b> |
| <b>3. Cell apoptosis western blot assays films of compound 4c</b>                    | <b>33</b> |

# 1. <sup>1</sup>H, <sup>13</sup>C NMR and HRMS spectra of synthesized products

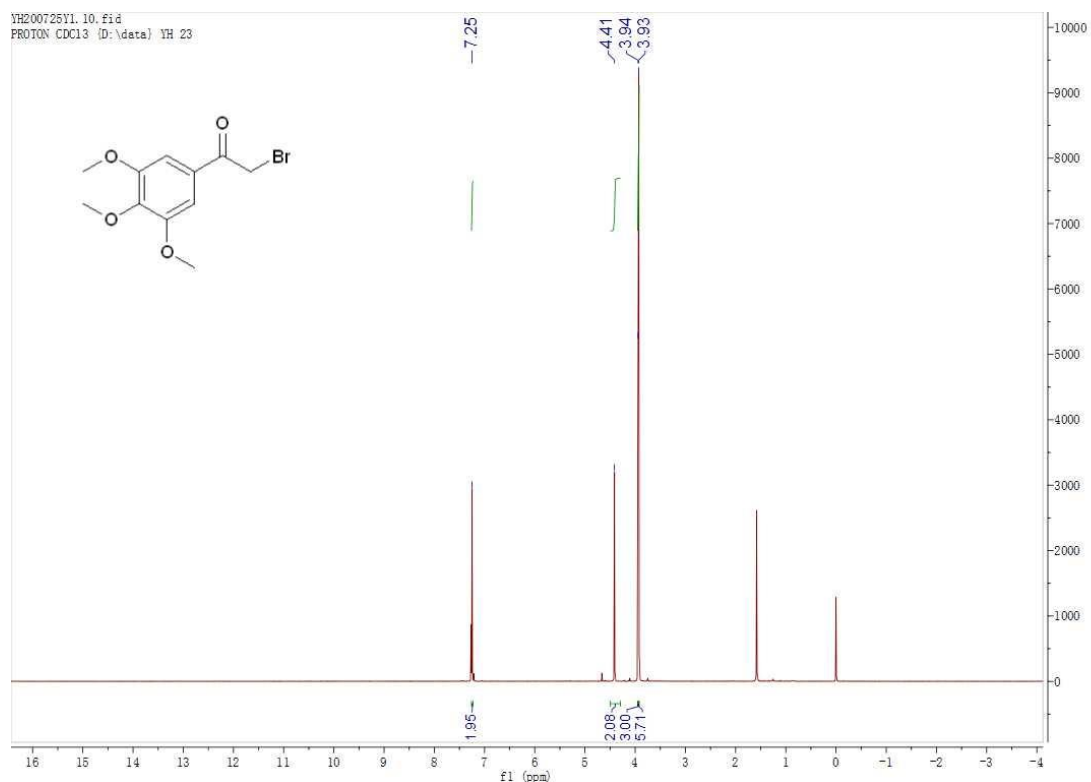

<sup>1</sup>H NMR of 2

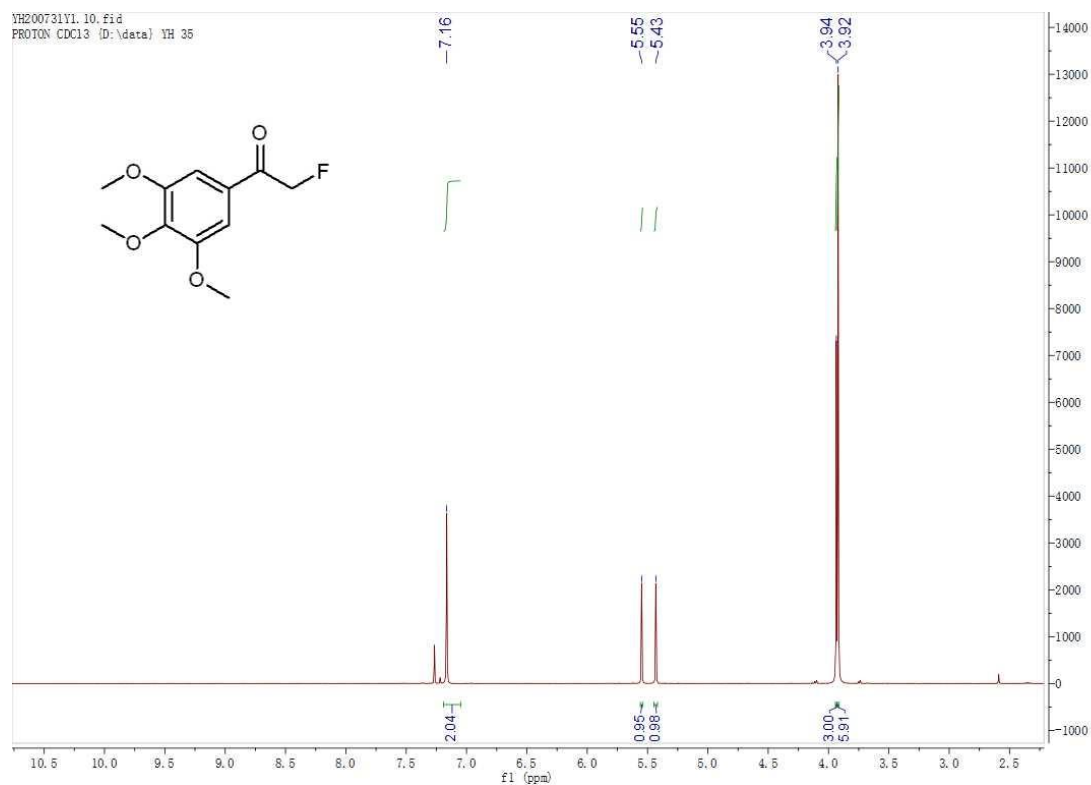

### $^1\text{H}$ NMR of 3

#### (1) $^1\text{H}$ , $^{13}\text{C}$ NMR and HRMS spectra of 4a

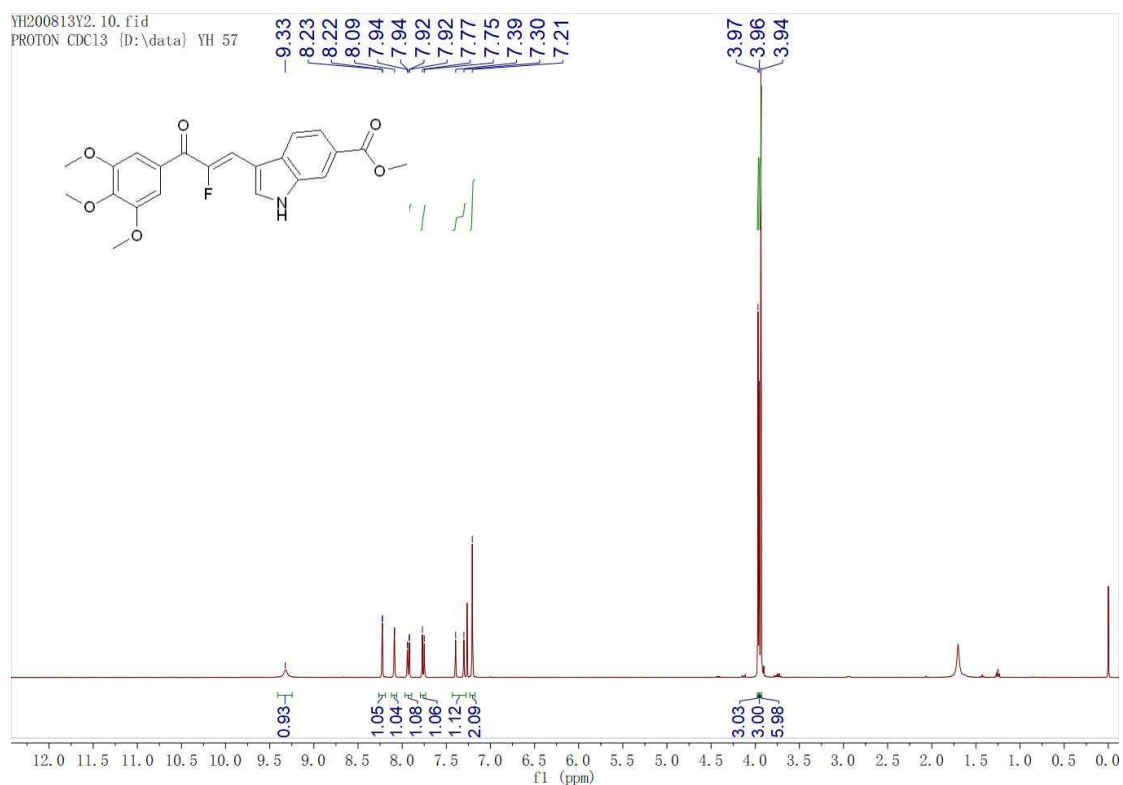

### $^1\text{H}$ NMR of 4a

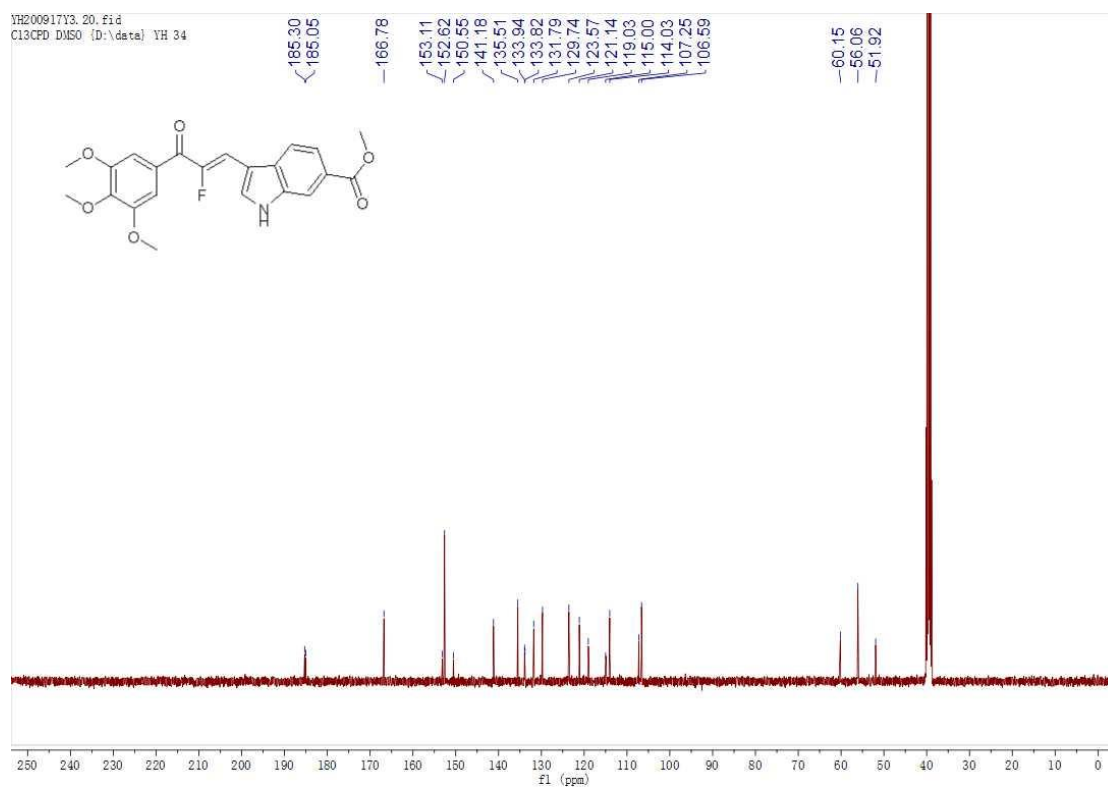

### $^{13}\text{C}$ NMR of 4a

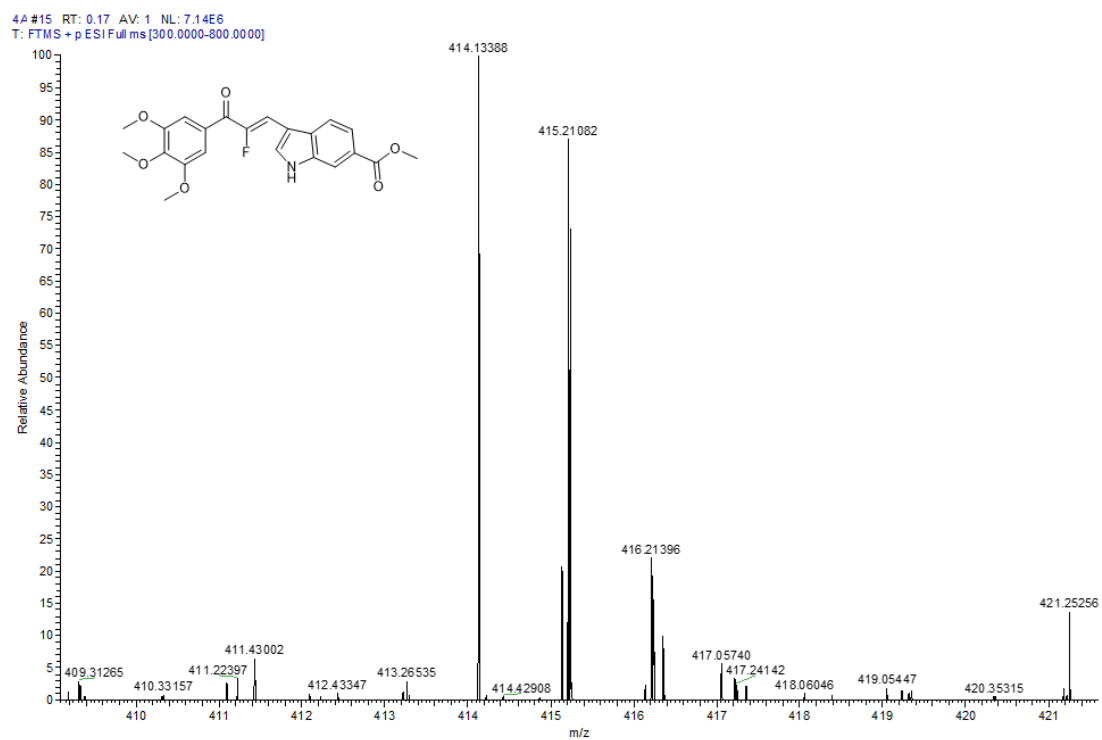

### HRMS of 4a

### (2) $^1\text{H}$ , $^{13}\text{C}$ NMR and HRMS spectra of 4b

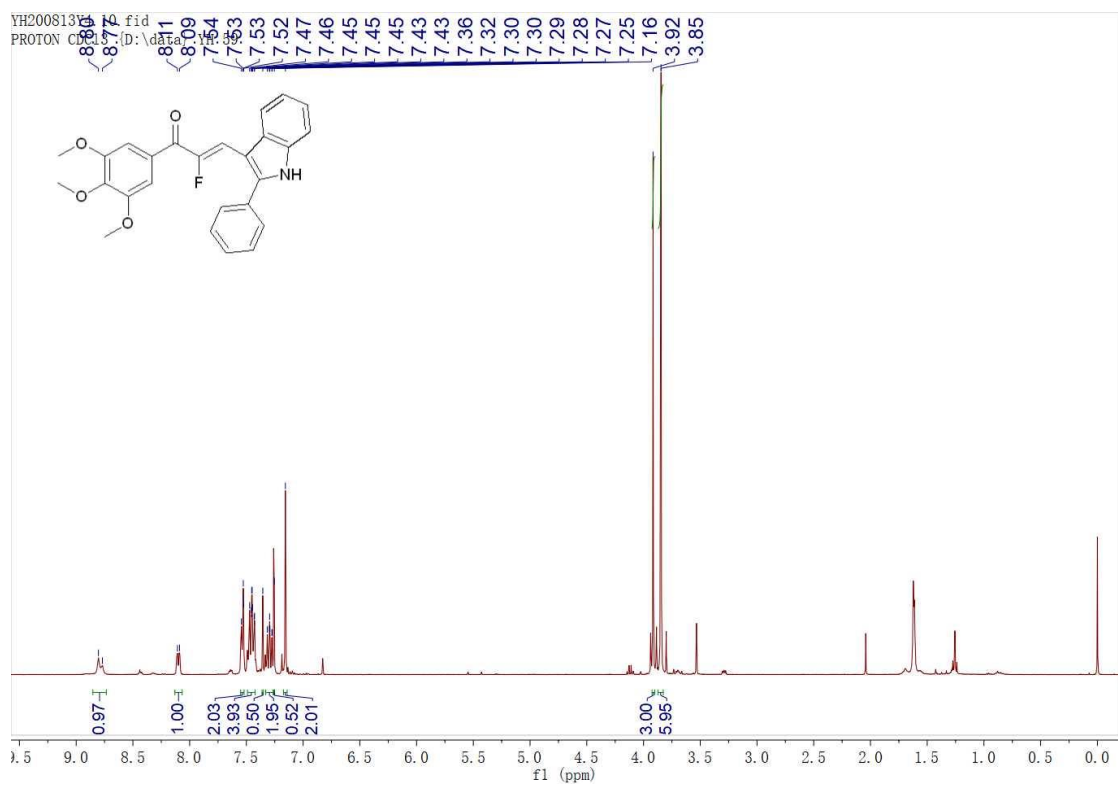

# <sup>1</sup>H NMR of 4b

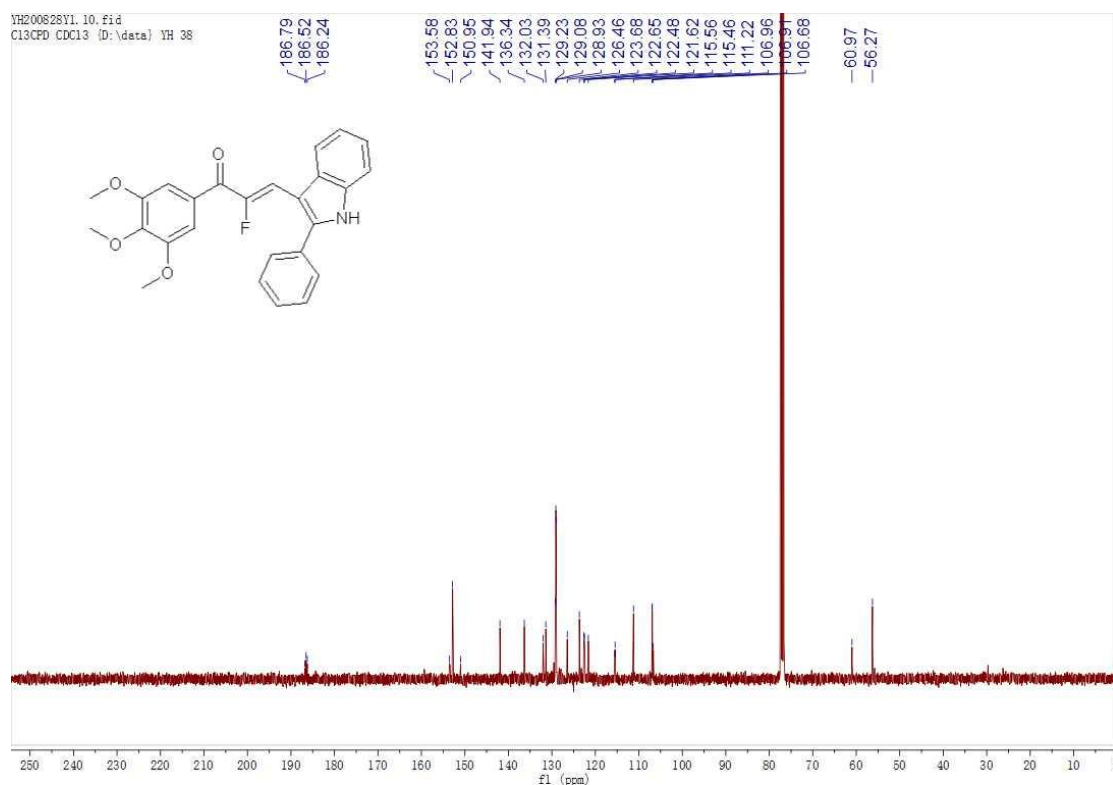

# <sup>13</sup>C NMR of 4b

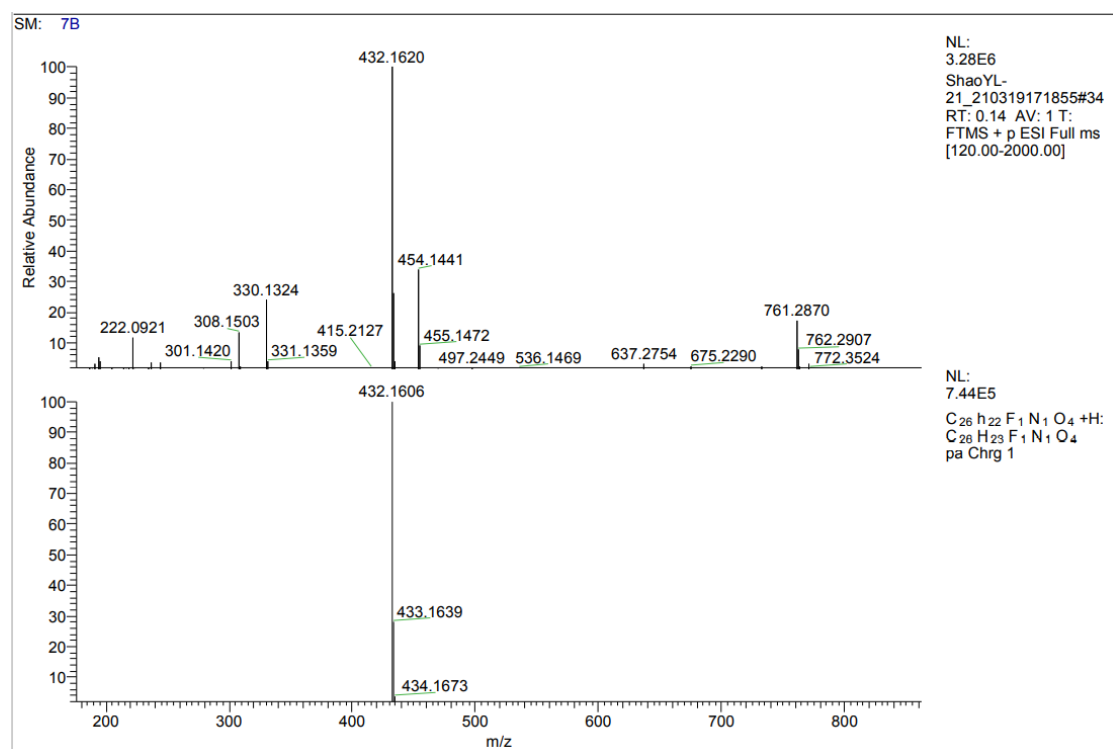

## HRMS of 4b

### (3) $^1\text{H}$ , $^{13}\text{C}$ NMR and HRMS spectra of 4c

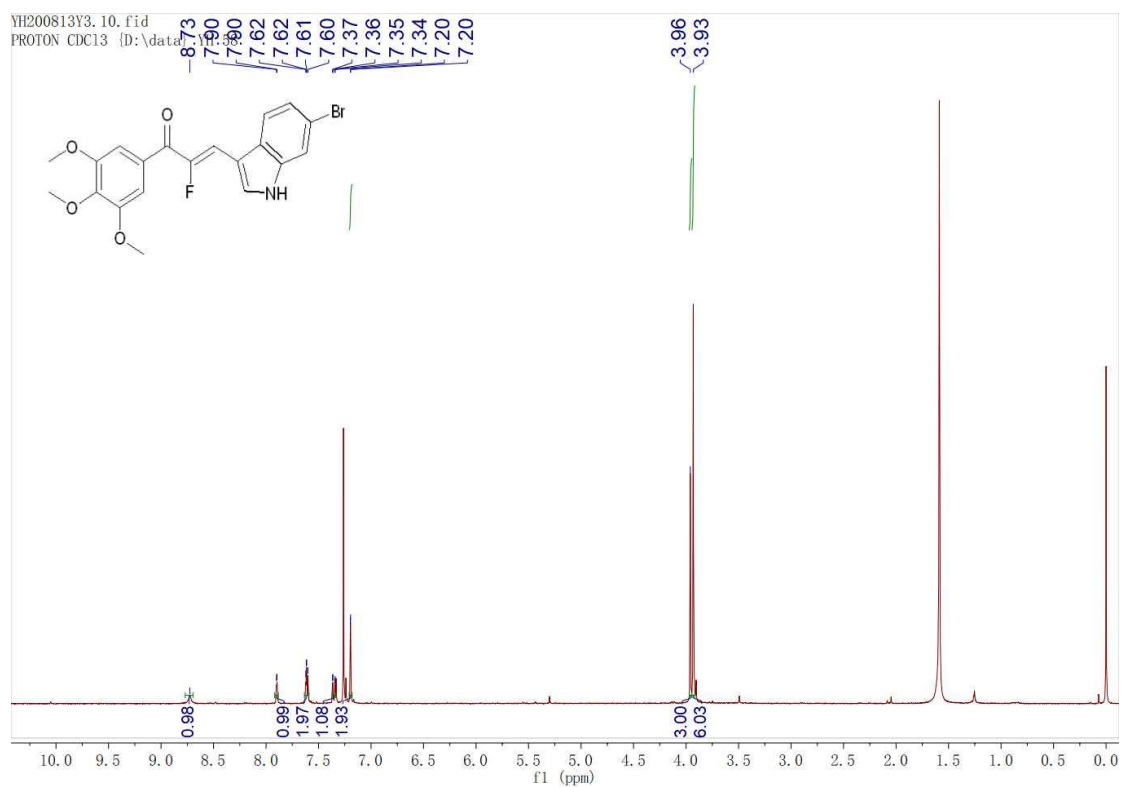

$^1\text{H}$  NMR of 4c

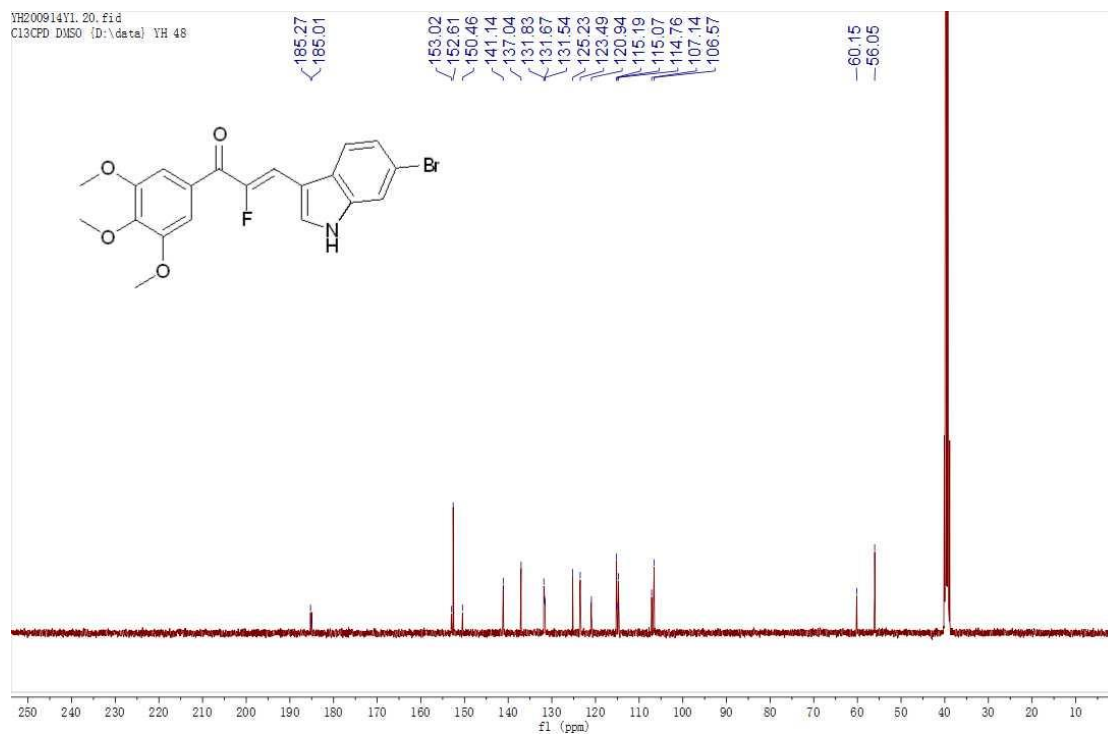

$^{13}\text{C}$  NMR of **4c**

C:\Users\...\ShaoYL-20\_210319171708

3/19/2021 5:17:08 PM

SM: 7B

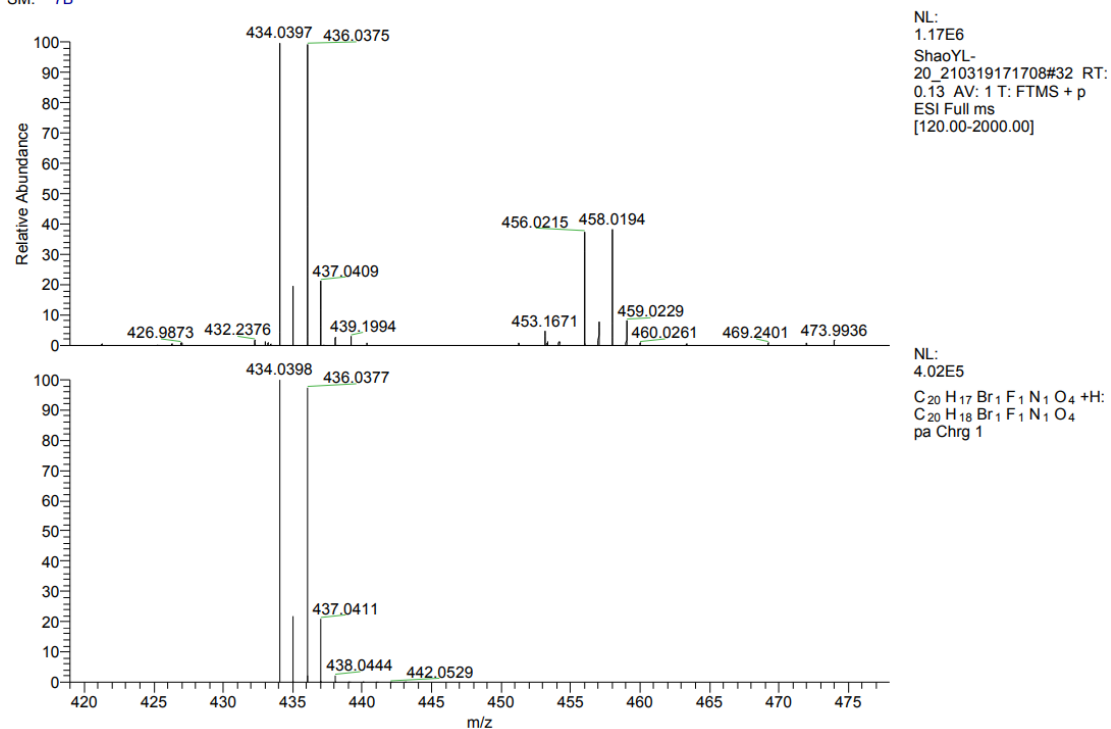

HRMS of **4c**

(4)  $^1\text{H}$ ,  $^{13}\text{C}$  NMR and HRMS spectra of **4d**

YH200813Y5.10.fid  
PROTON CDCl3 {D:\data} YH 60

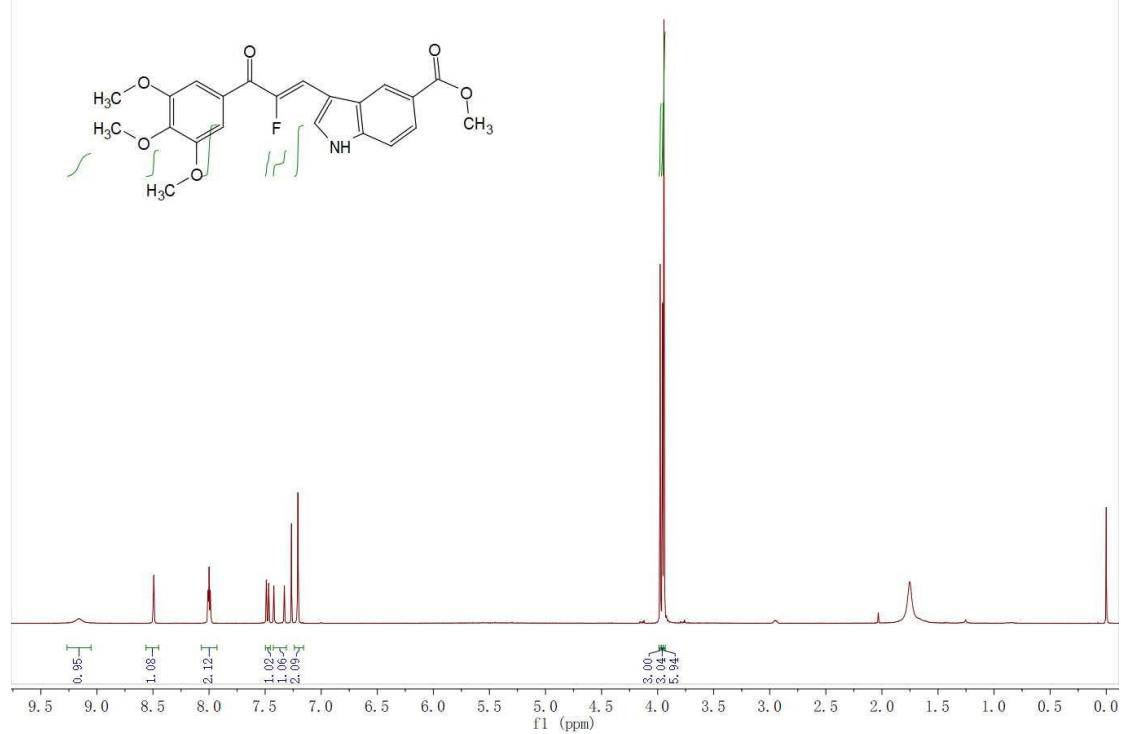

<sup>1</sup>H NMR of 4d

YH200910Y1.20.fid  
C13CPD DMSO {D:\data} YH 25

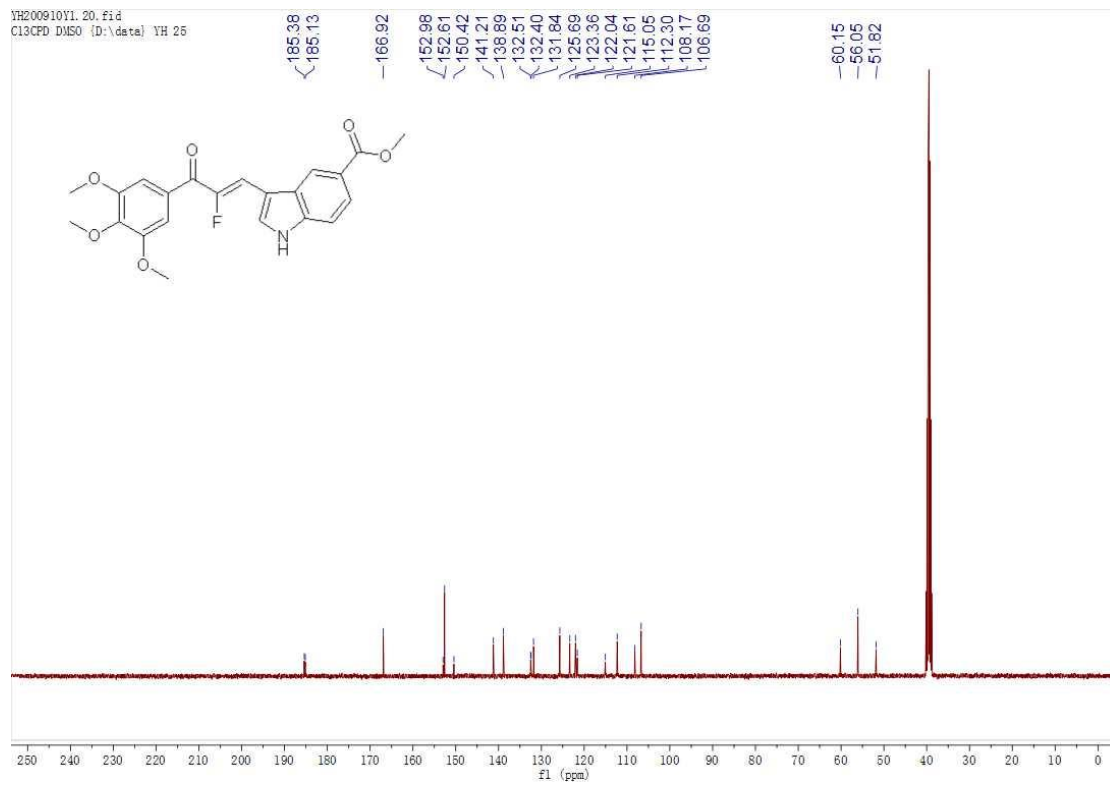

<sup>13</sup>C NMR of 4d





### <sup>1</sup>H NMR of 4e

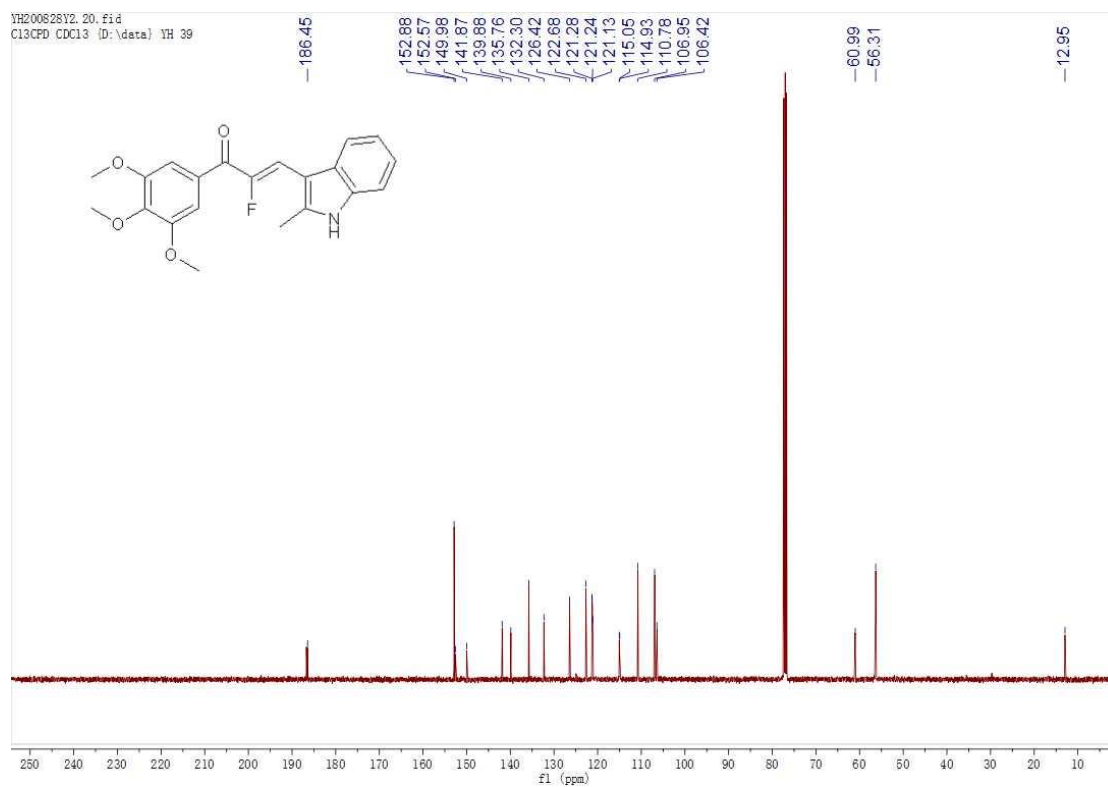

### <sup>13</sup>C NMR of 4e

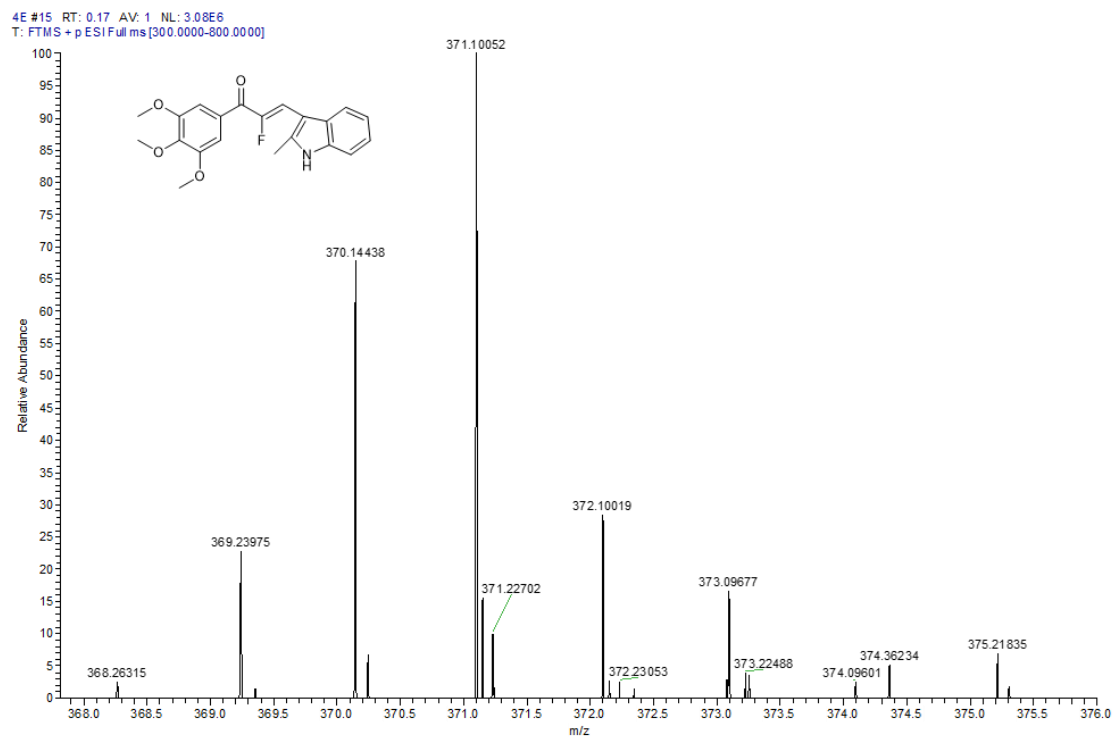

### HRMS of 4e

(6)  $^1\text{H}$ ,  $^{13}\text{C}$  NMR and HRMS spectra of **4f**

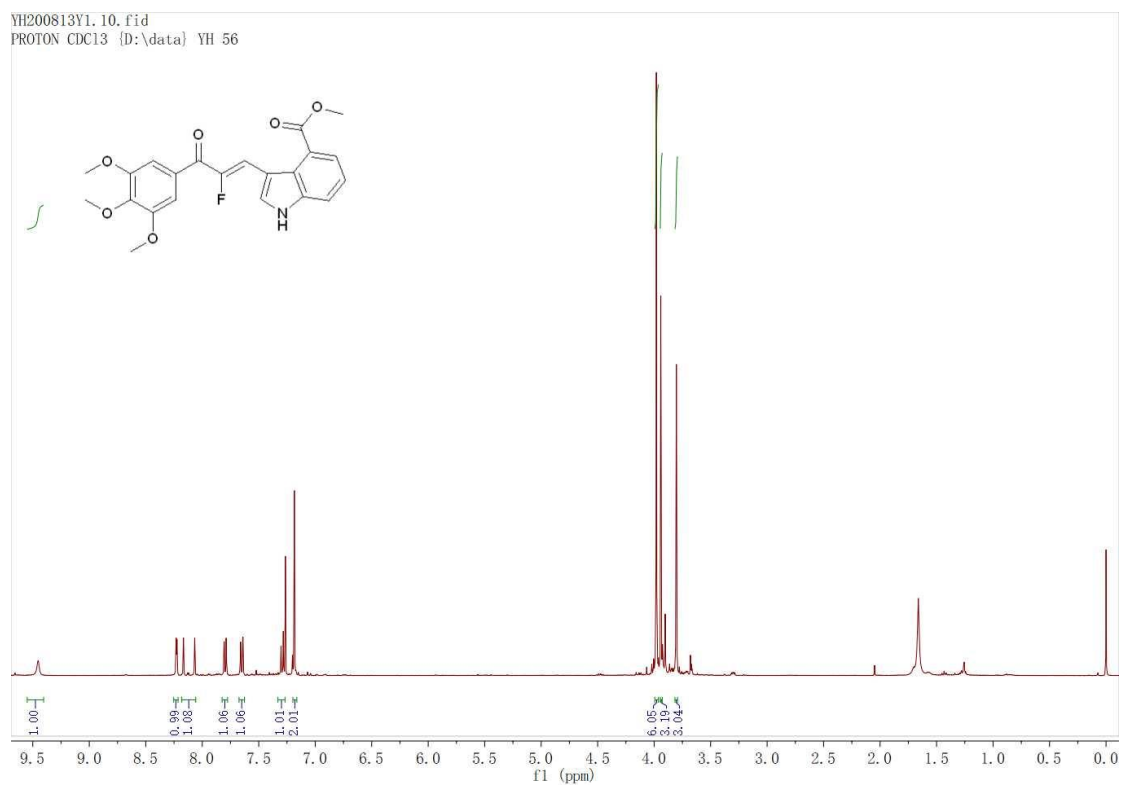

$^1\text{H}$  NMR of **4f**

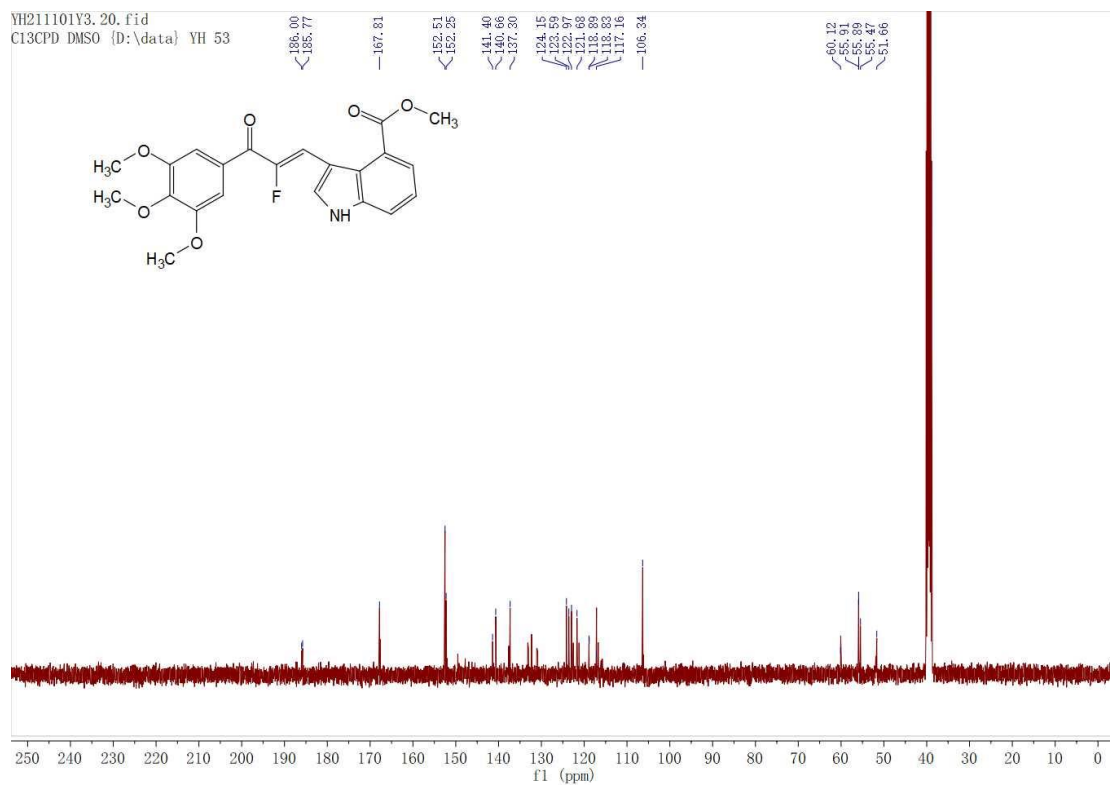

### $^{13}\text{C}$ NMR of **4f**

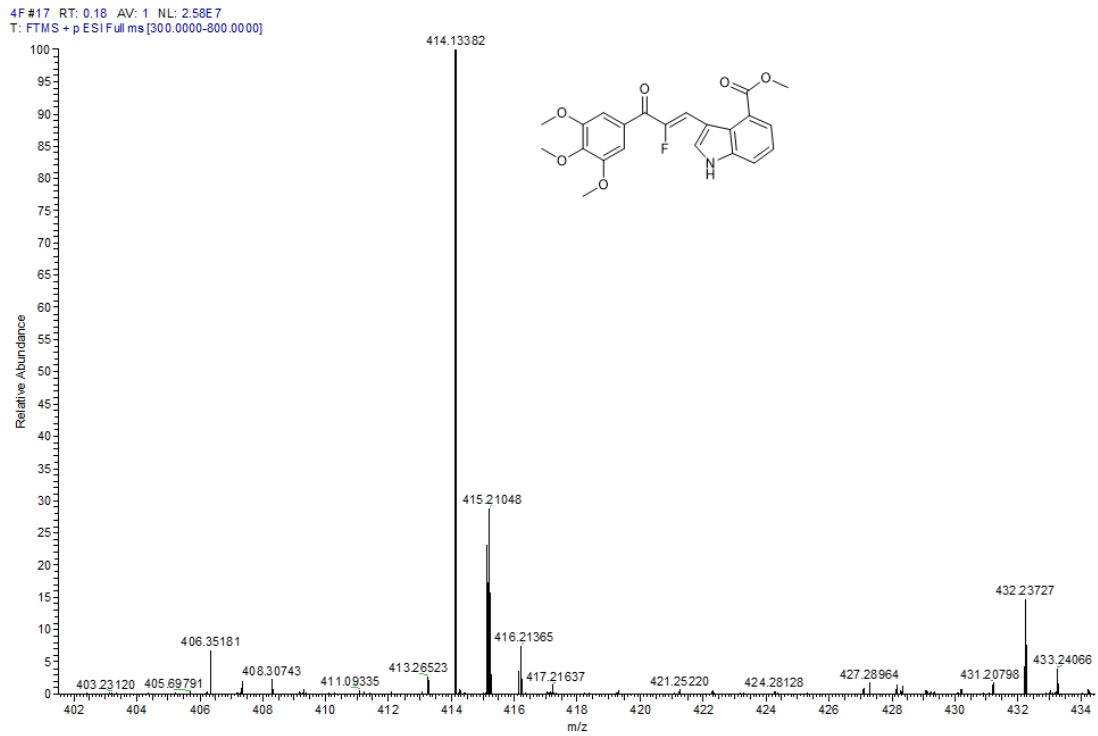

### (7) $^1\text{H}$ , $^{13}\text{C}$ NMR and HRMS spectra of **4g**

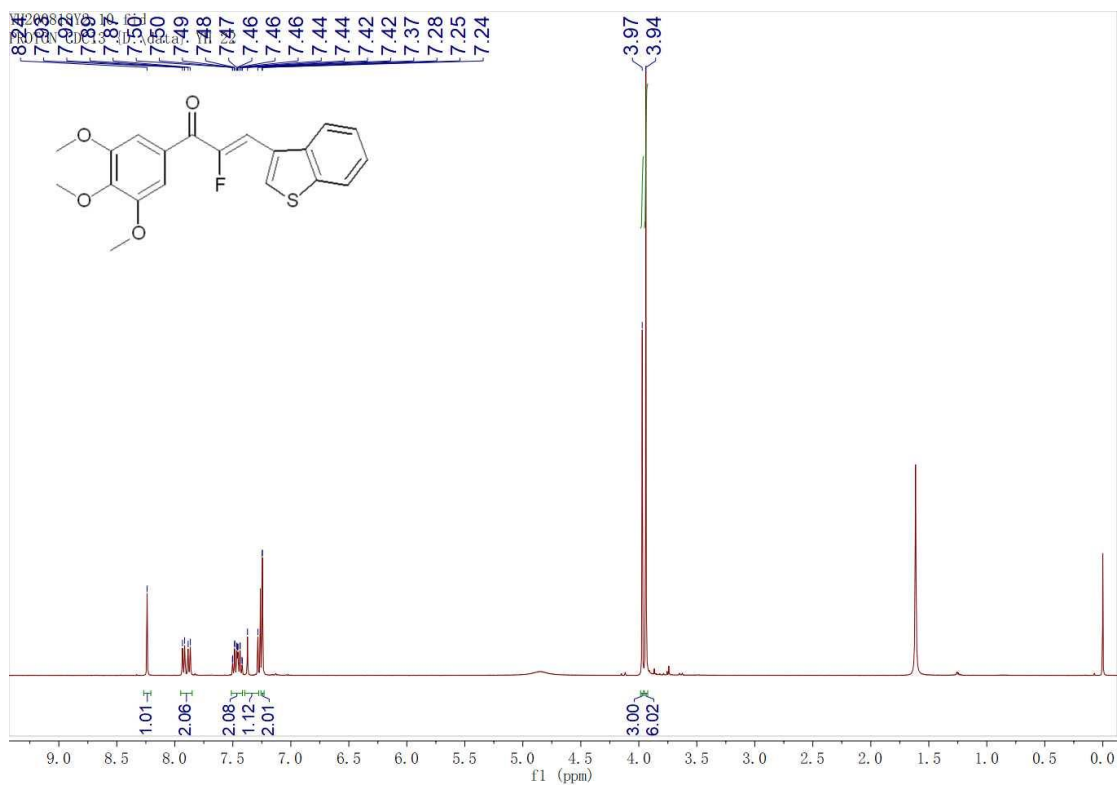

### <sup>1</sup>H NMR of 4g

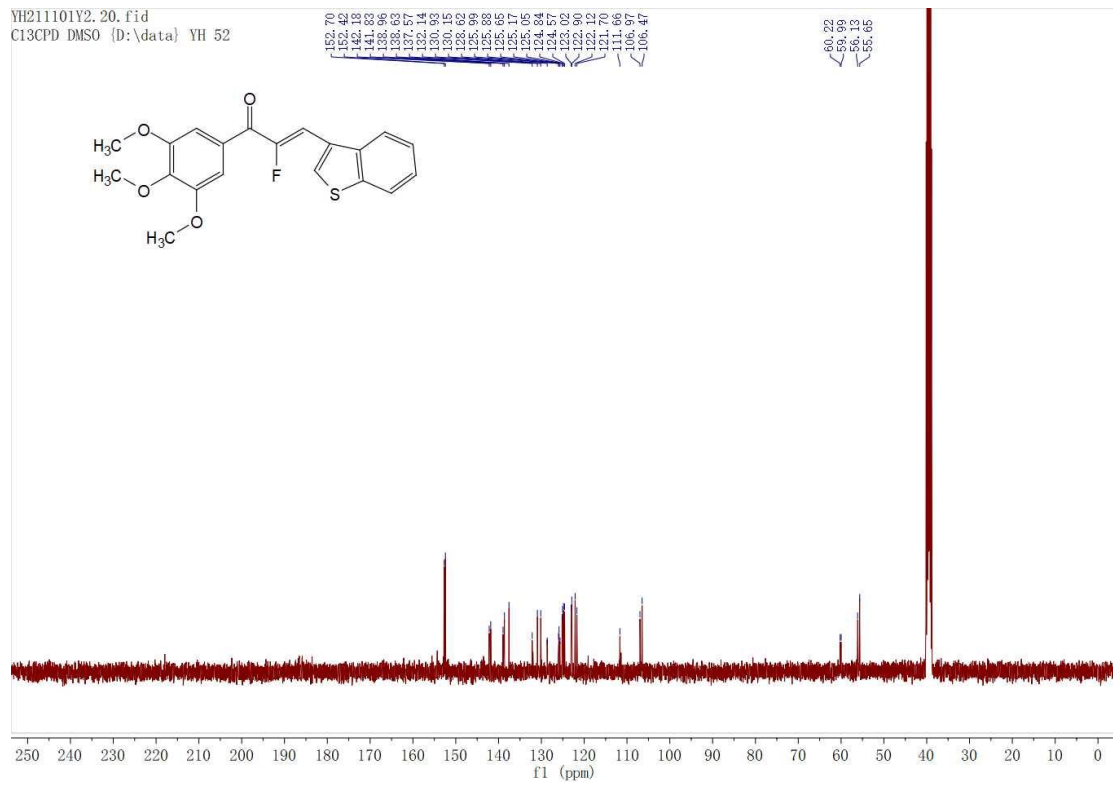

### <sup>13</sup>C NMR of 4g

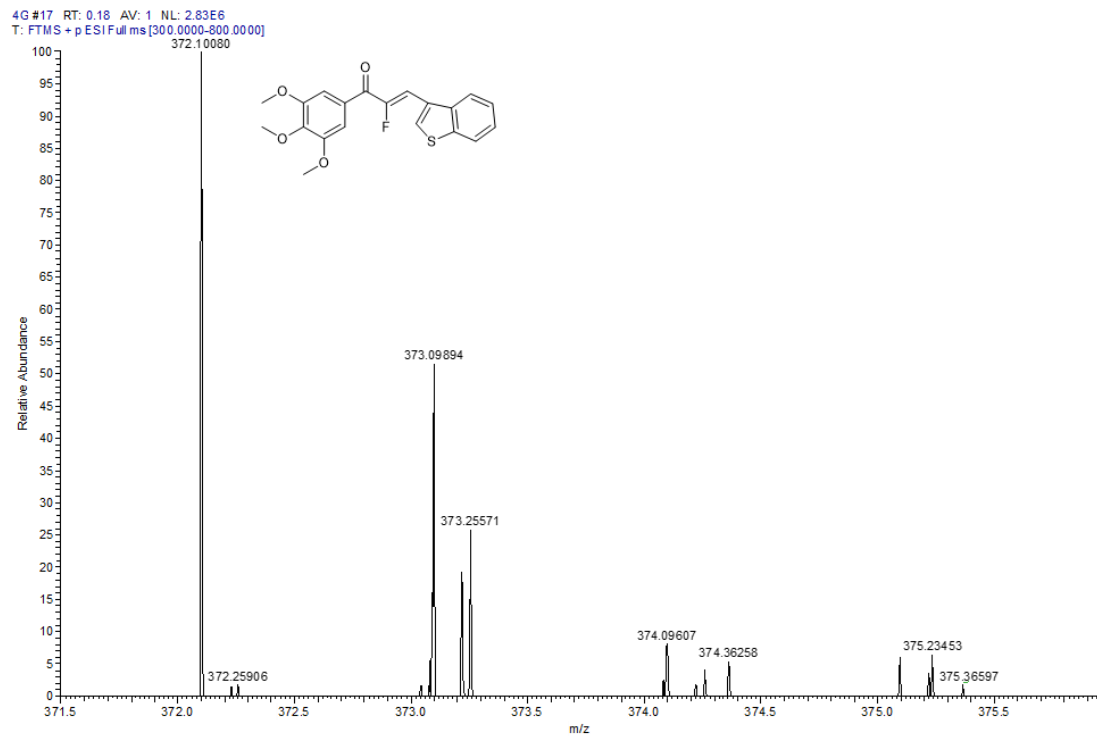

### HRMS of 4g

(8)  $^1\text{H}$ ,  $^{13}\text{C}$  NMR and HRMS spectra of **4h**

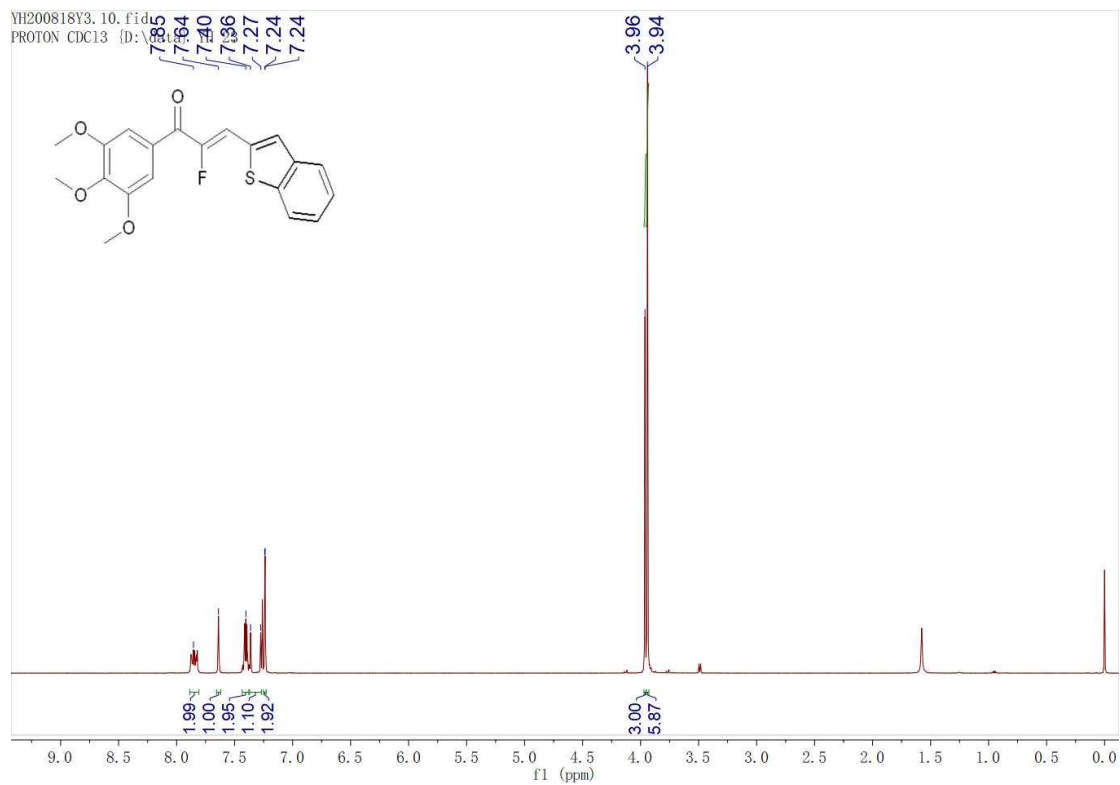

$^1\text{H}$  NMR of **4h**

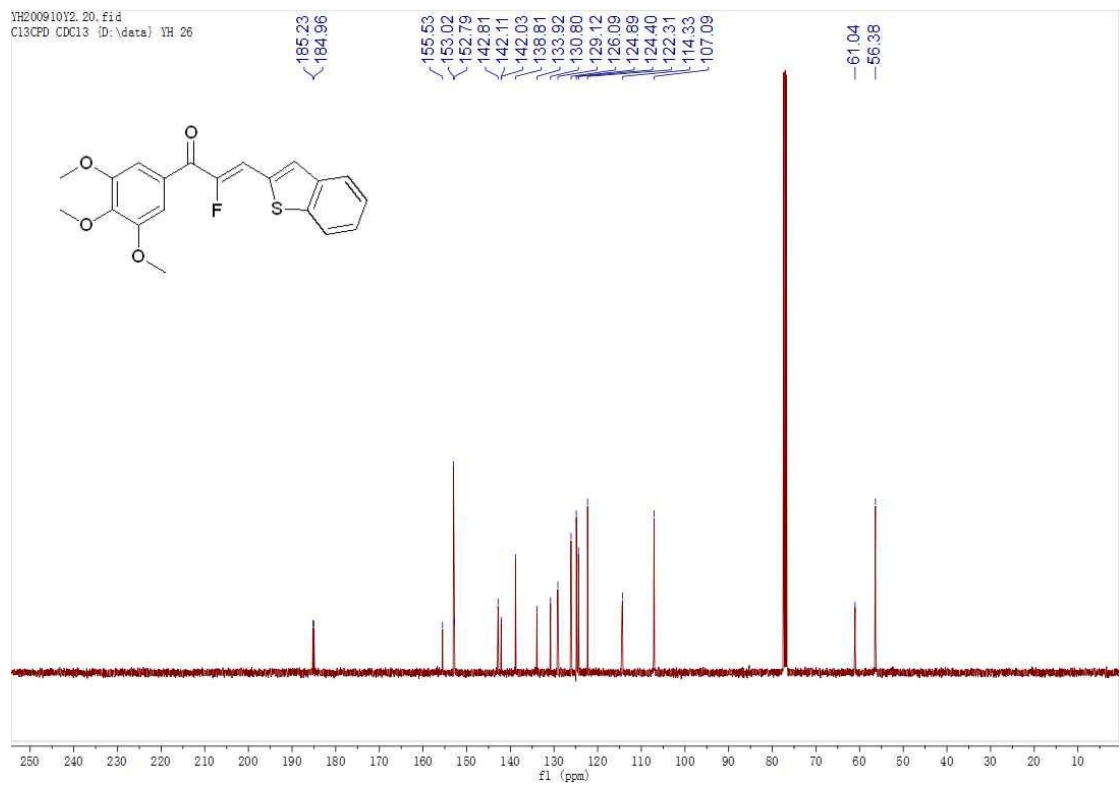

### $^{13}\text{C}$ NMR of **4h**

4H#17 RT: 0.18 AV: 1 NL: 2.83E6  
T: FTMS + p ESI Full ms [300.0000-800.0000]

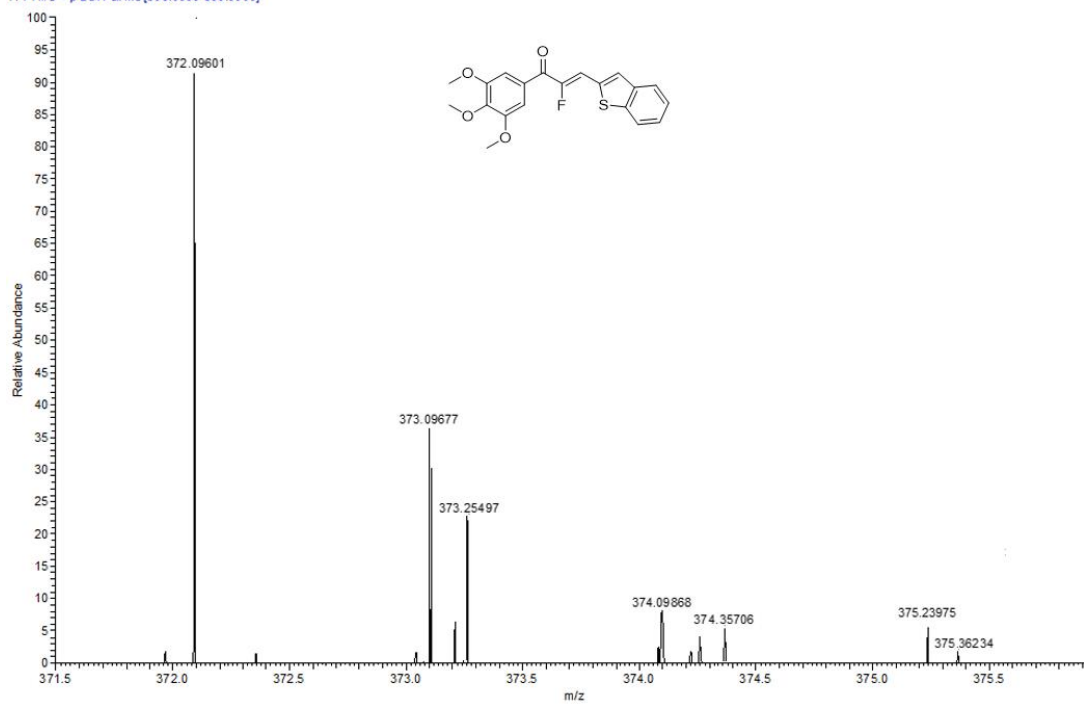

### HRMS of **4h**

(9)  $^1\text{H}$ ,  $^{13}\text{C}$  NMR and HRMS spectra of **4i**

YH200928Y2.10.fid  
PROTON CDCl3 {D:\data} YH 10

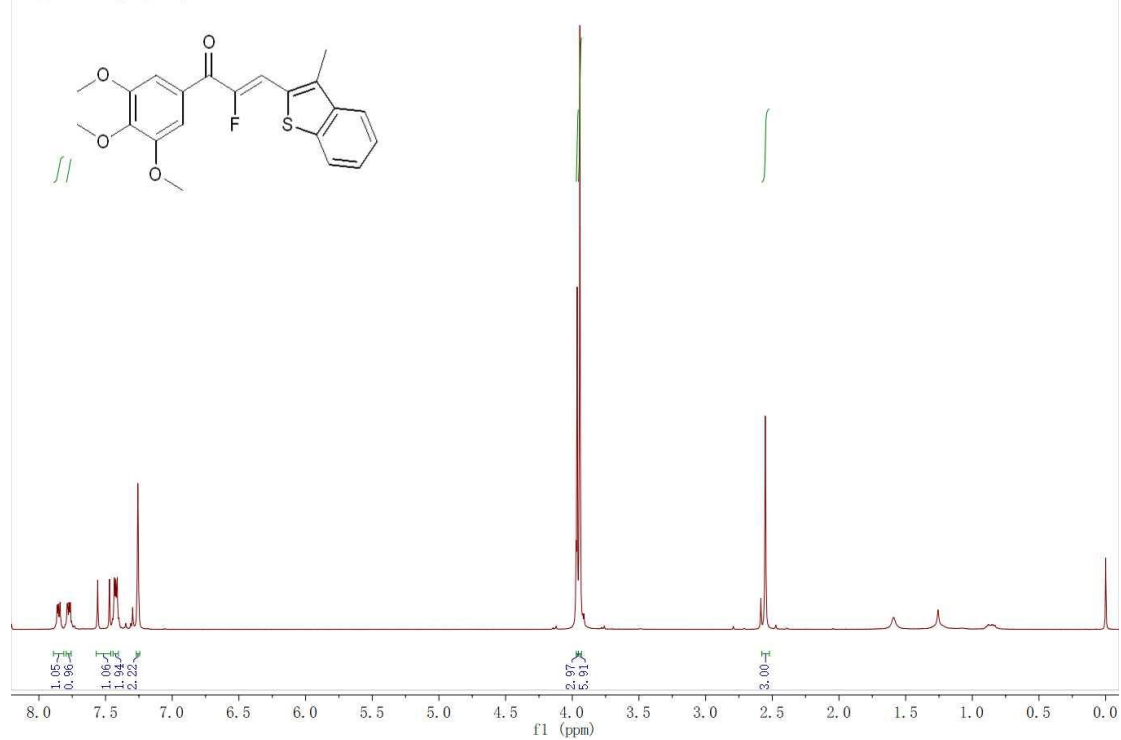

<sup>1</sup>H NMR of 4i

YMH-18.20.fid  
C13CPD CDCl3 {D:\data} YH 5

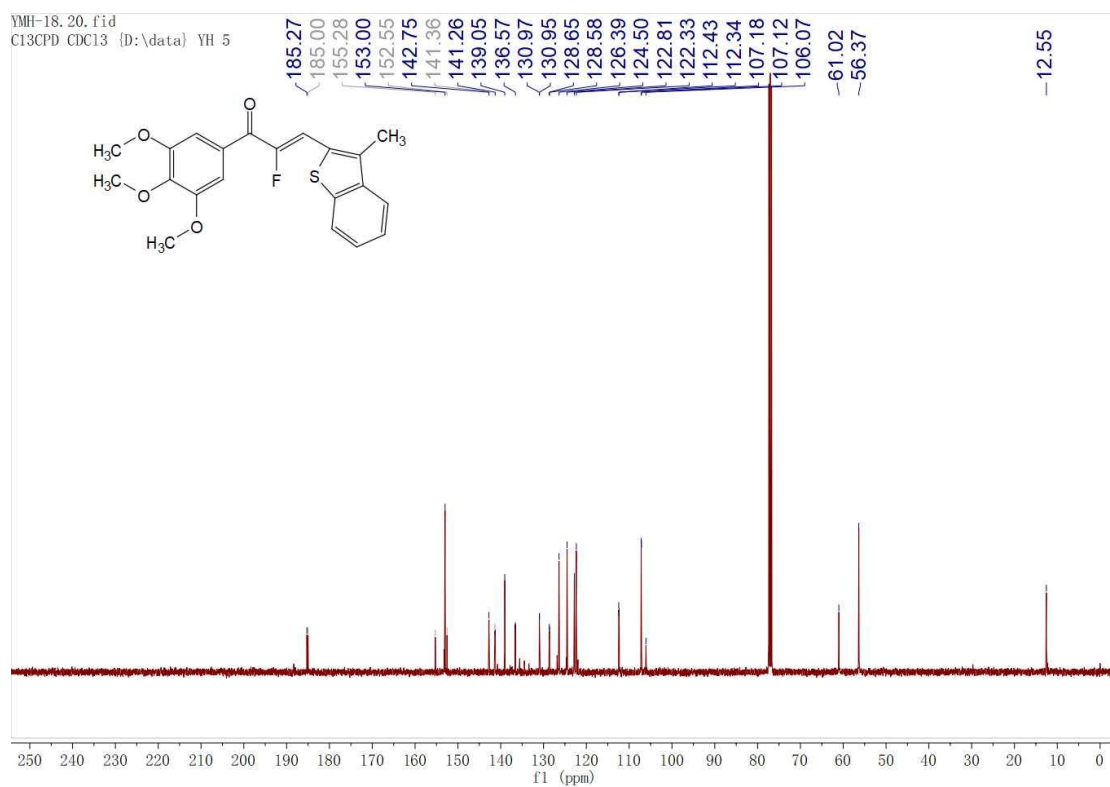

<sup>13</sup>C NMR of 4i



4 #15 RT: 0.16 AV: 1 NL: 9.79E6  
T: FTMS + p ESI Full ms [300.0000-800.0000]

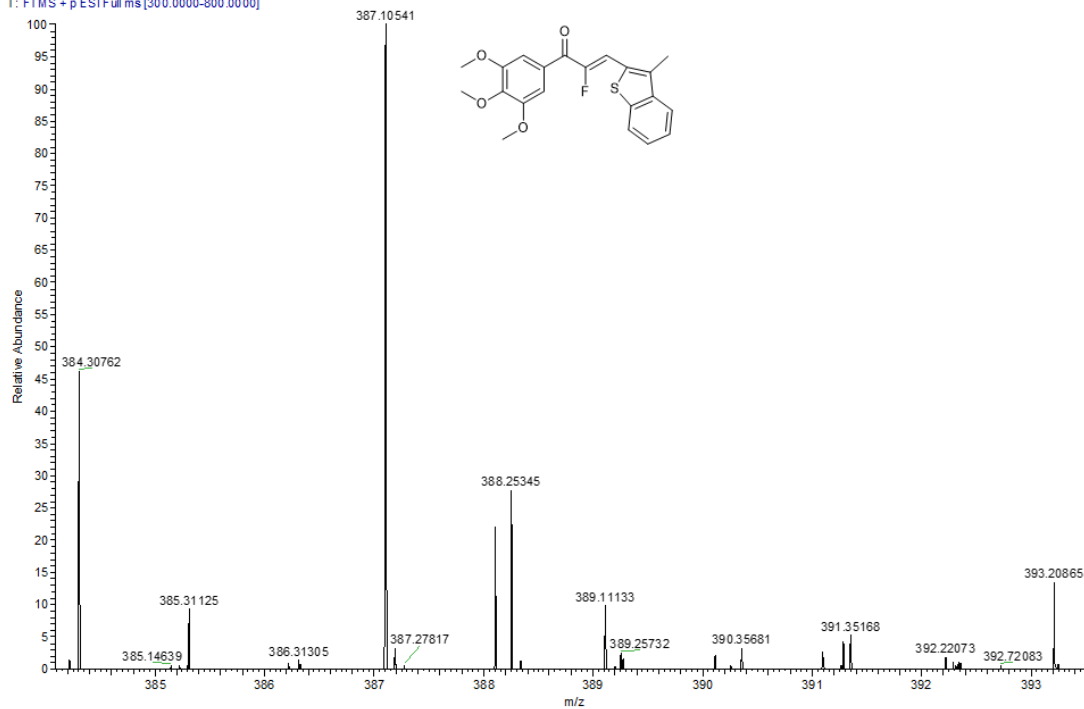

### (10) $^1\text{H}$ , $^{13}\text{C}$ NMR and HRMS spectra of **4j**

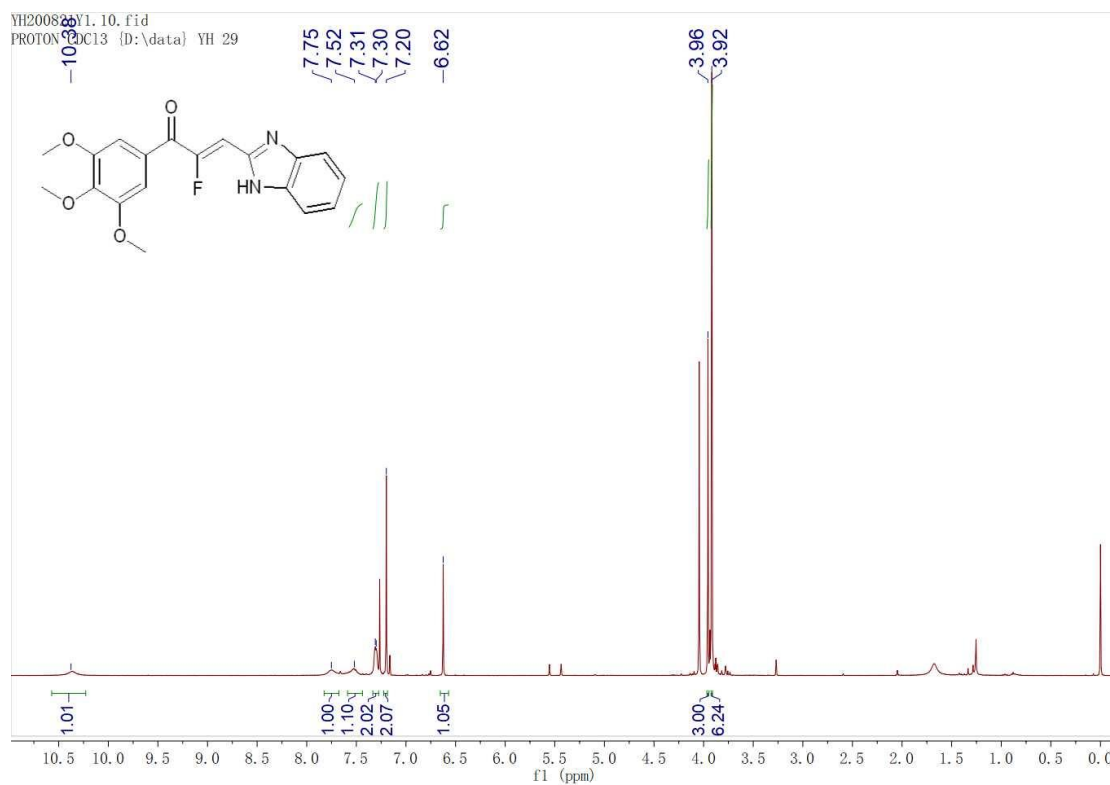

### <sup>1</sup>H NMR of 4j

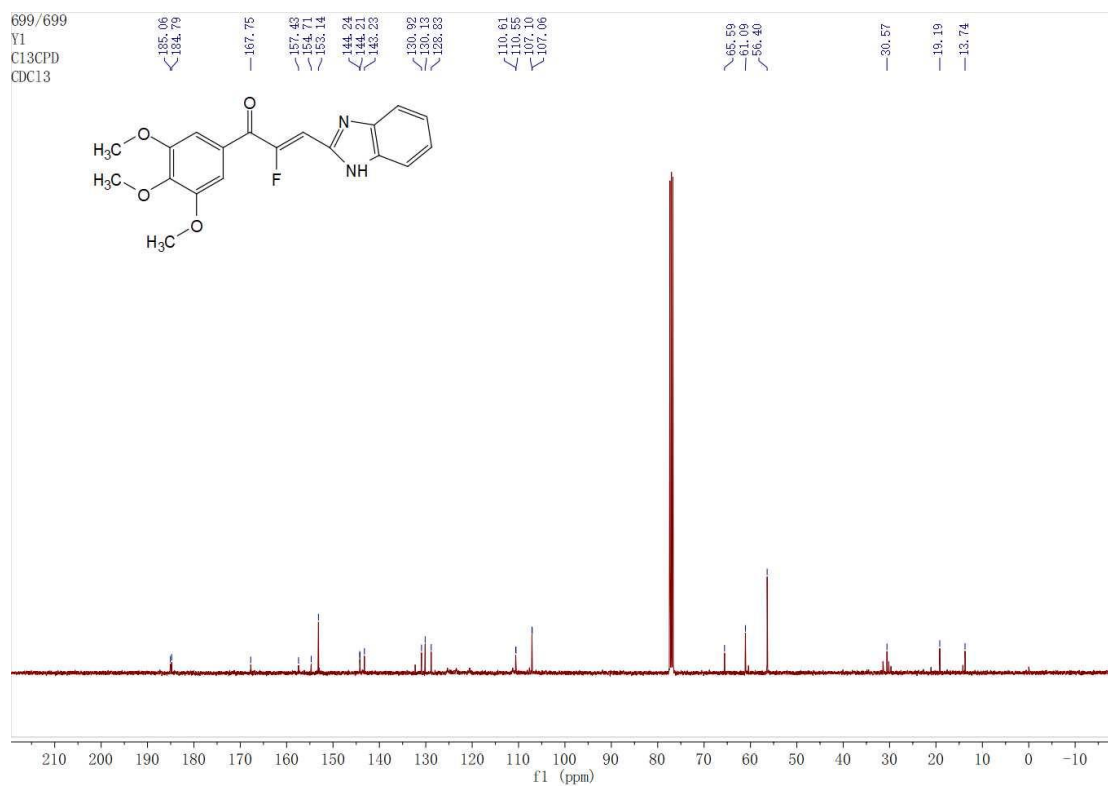

### <sup>13</sup>C NMR of 4j

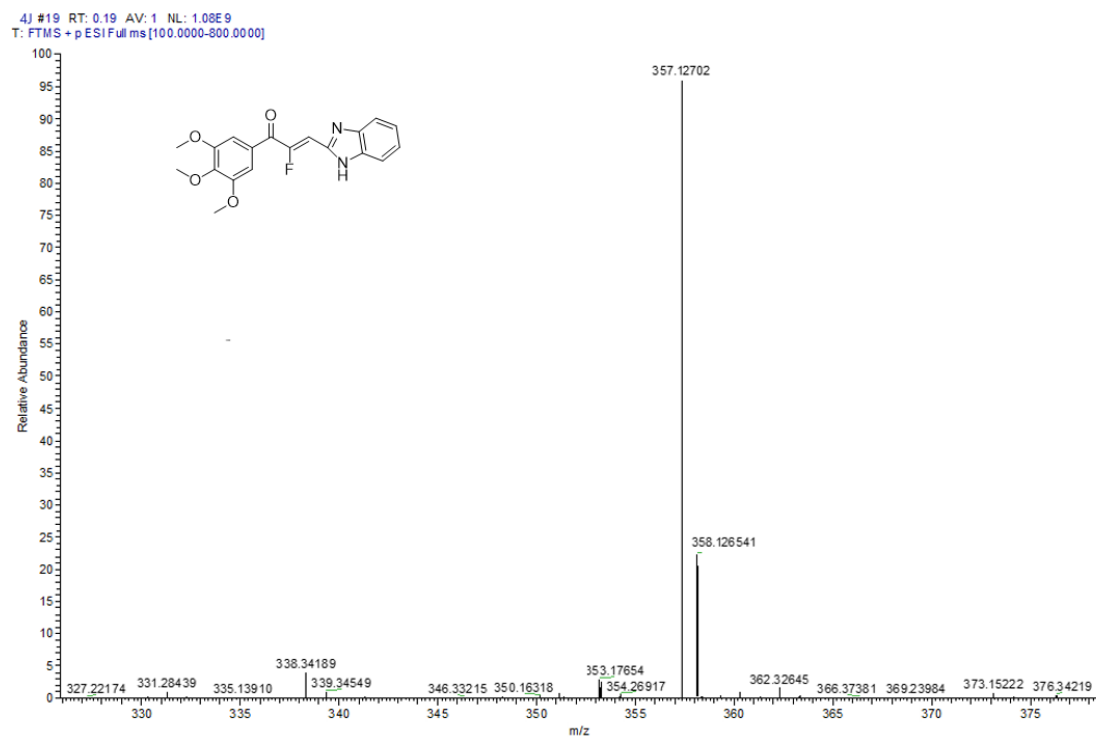

### HRMS of 4j

(11)  $^1\text{H}$ -,  $^{13}\text{C}$  NMR and HRMS spectra of **4k**

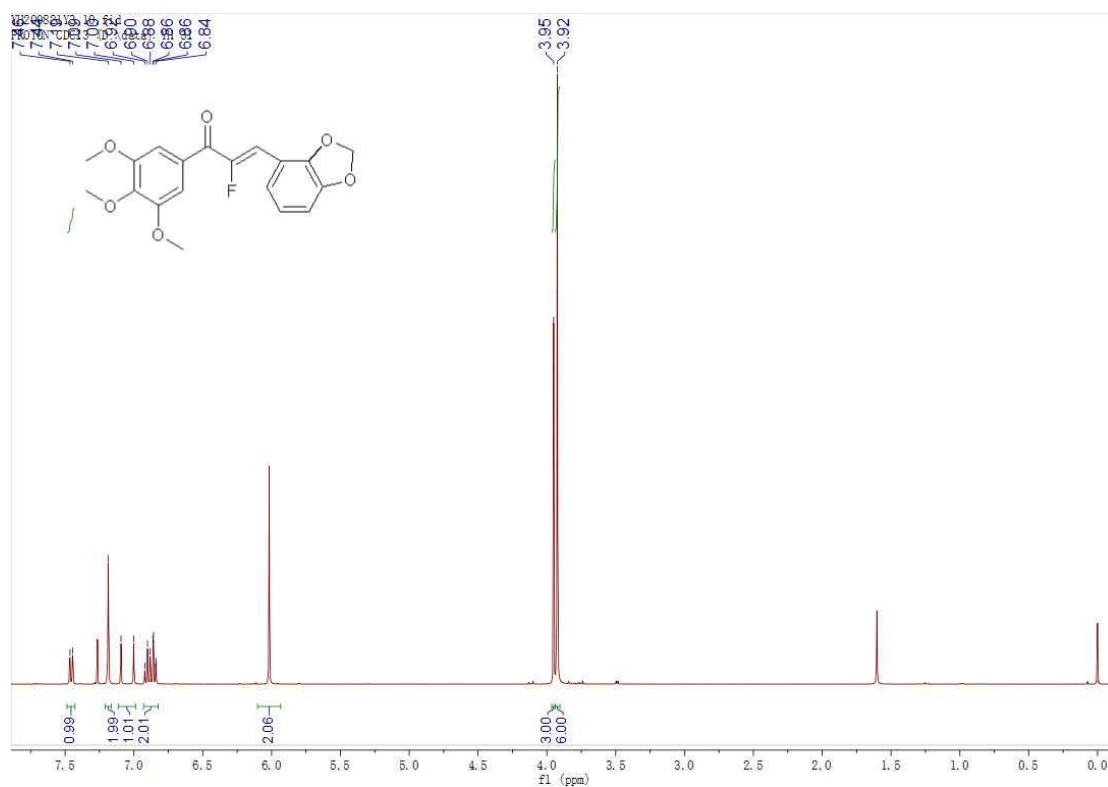

$^1\text{H}$  NMR of **4k**

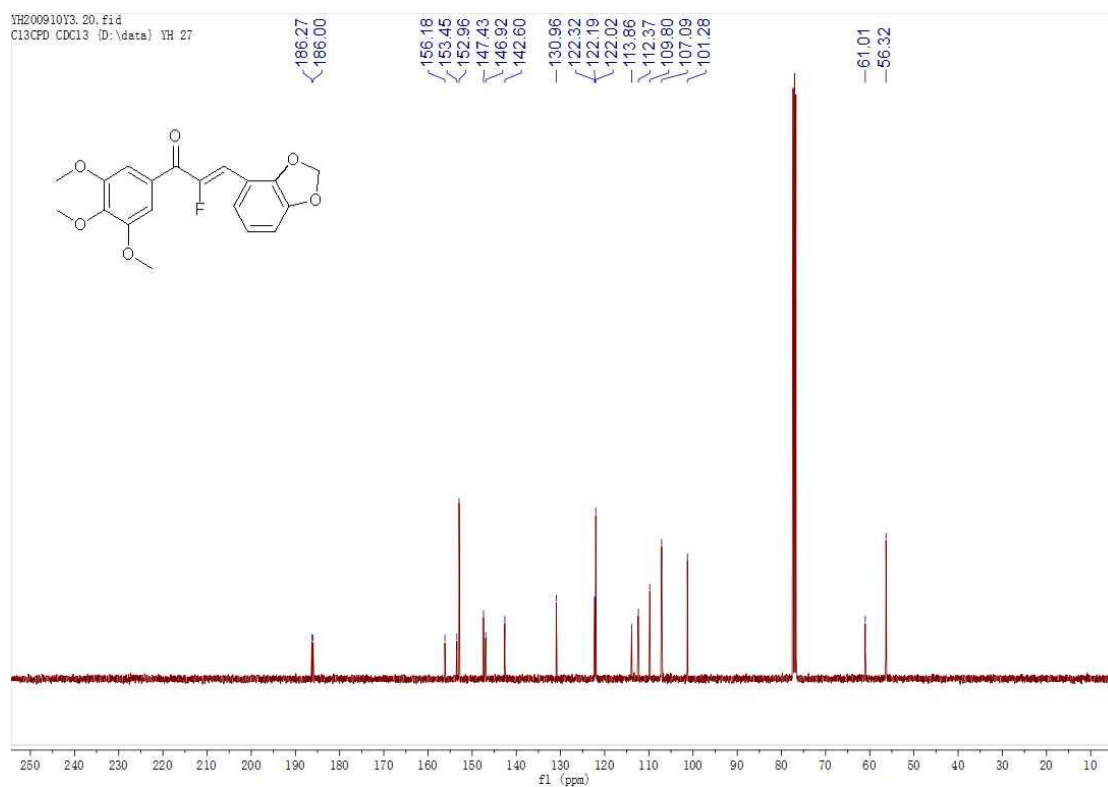

### $^{13}\text{C}$ NMR of **4k**

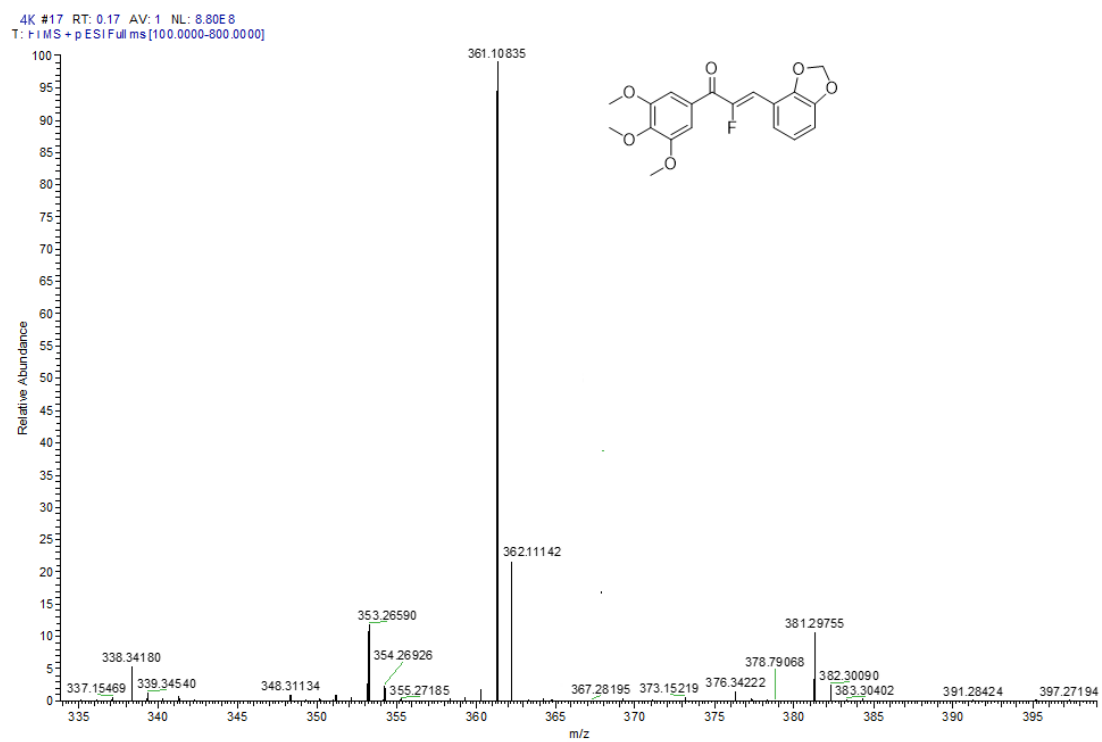

### HRMS of **4k**

(**12**)  $^1\text{H}$ ,  $^{13}\text{C}$  NMR and HRMS spectra of **4l**

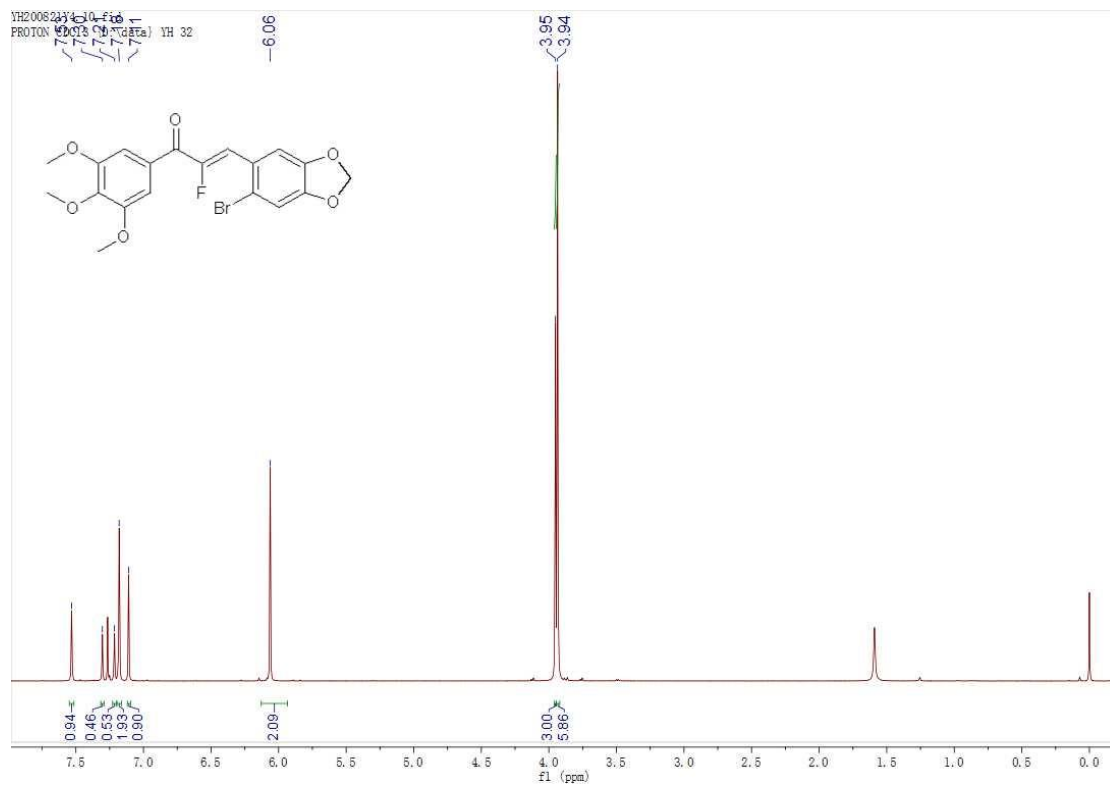

<sup>1</sup>H NMR of 41

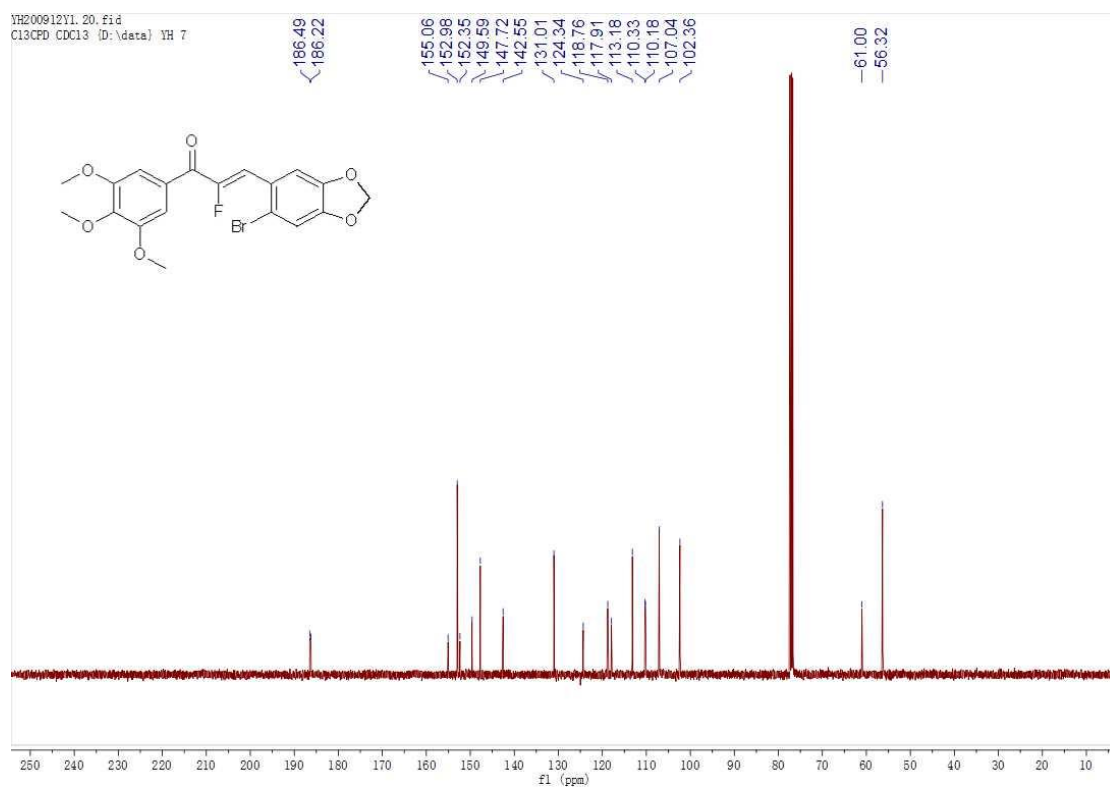

<sup>13</sup>C NMR of 41

4L #15 RT: 0.17 AV: 1 NL: 2.24E6  
T: FTMS + p ESI Full ms [300.0000-800.0000]

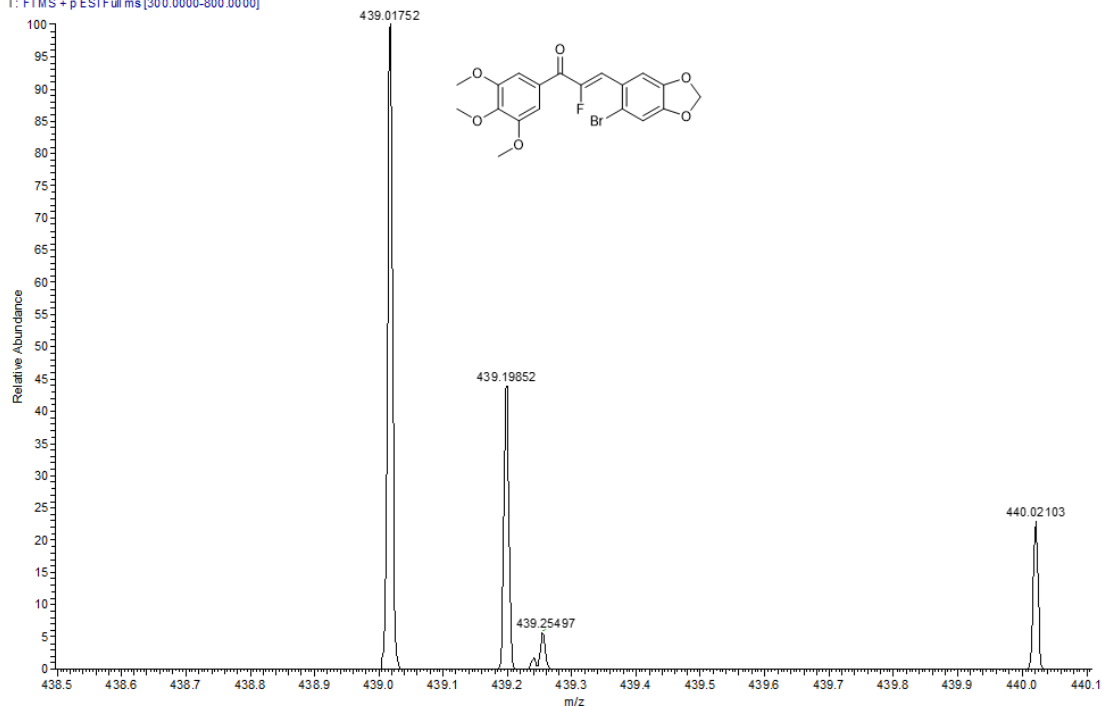

HRMS of 4l

(13)<sup>1</sup>H, <sup>13</sup>C NMR and HRMS spectra of 4m

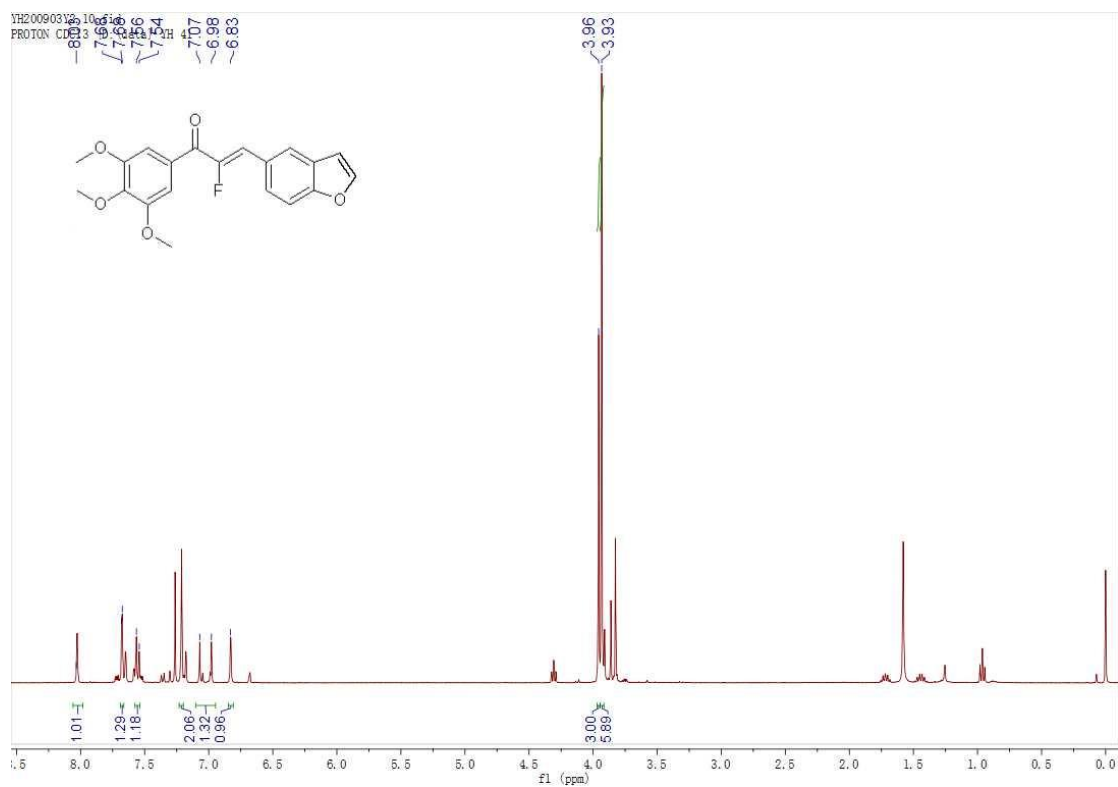

<sup>1</sup>H NMR of 4m

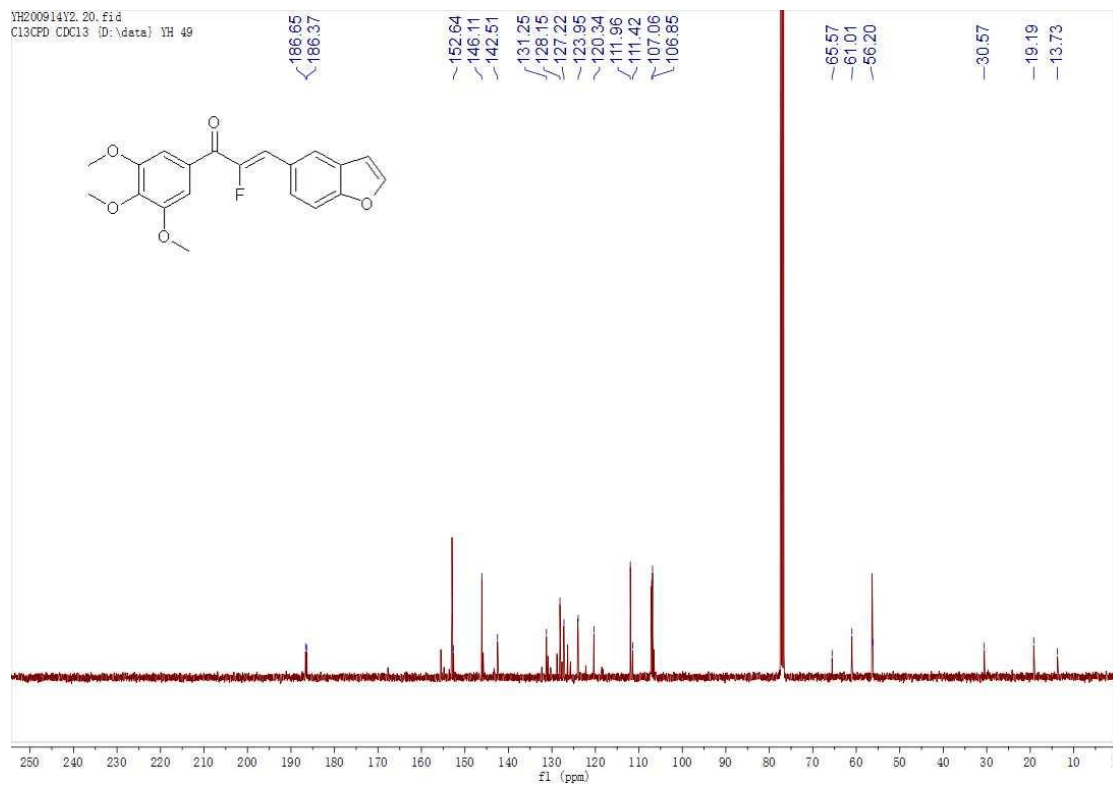

<sup>13</sup>C NMR of 4m

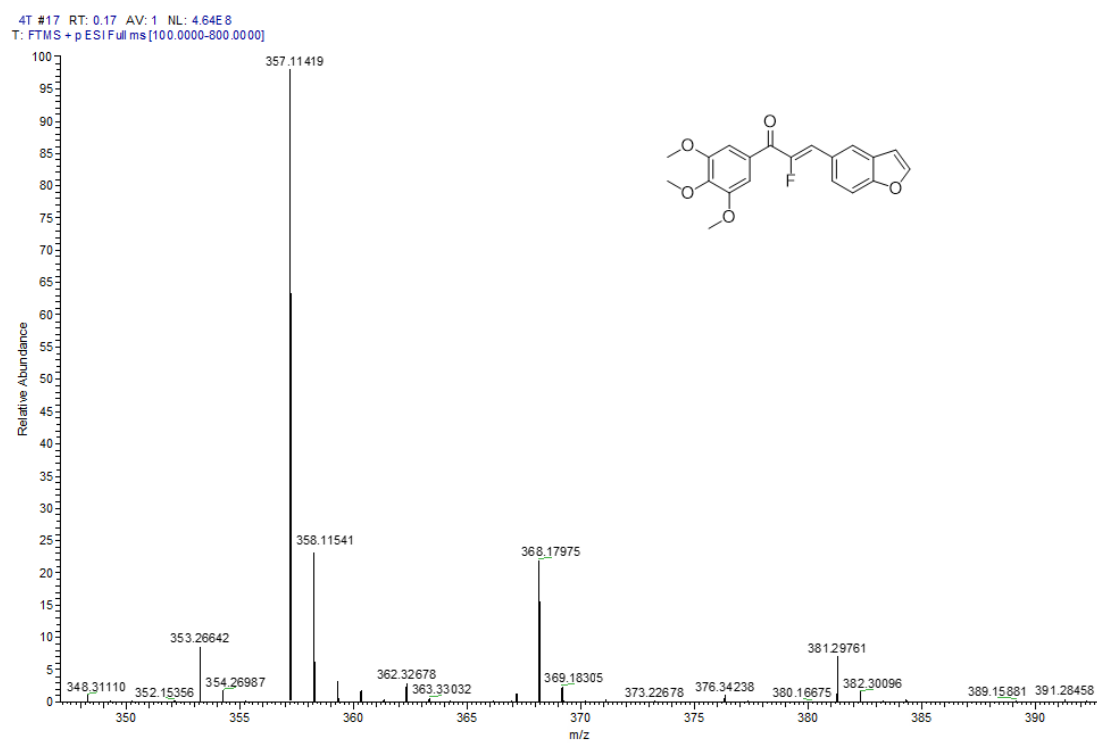

HRMS of 4m

(14)  $^1\text{H}$ ,  $^{13}\text{C}$  NMR and HRMS spectra of **4n**

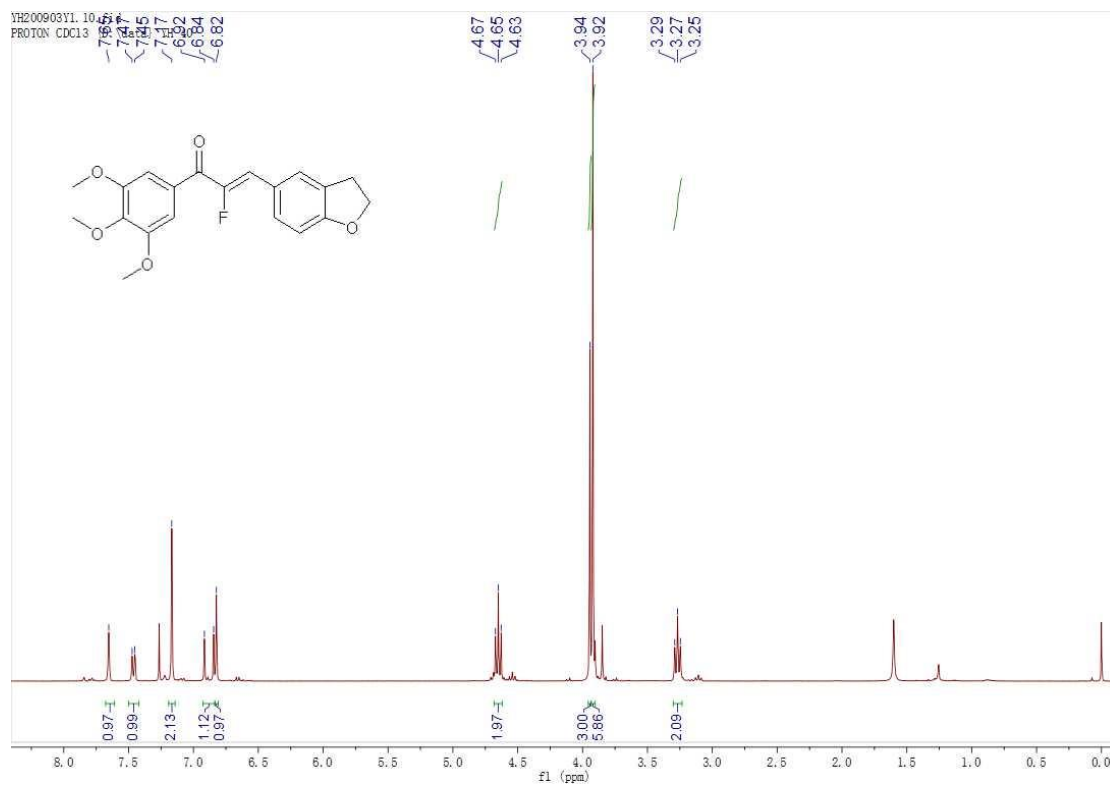

$^1\text{H}$  NMR of **4n**

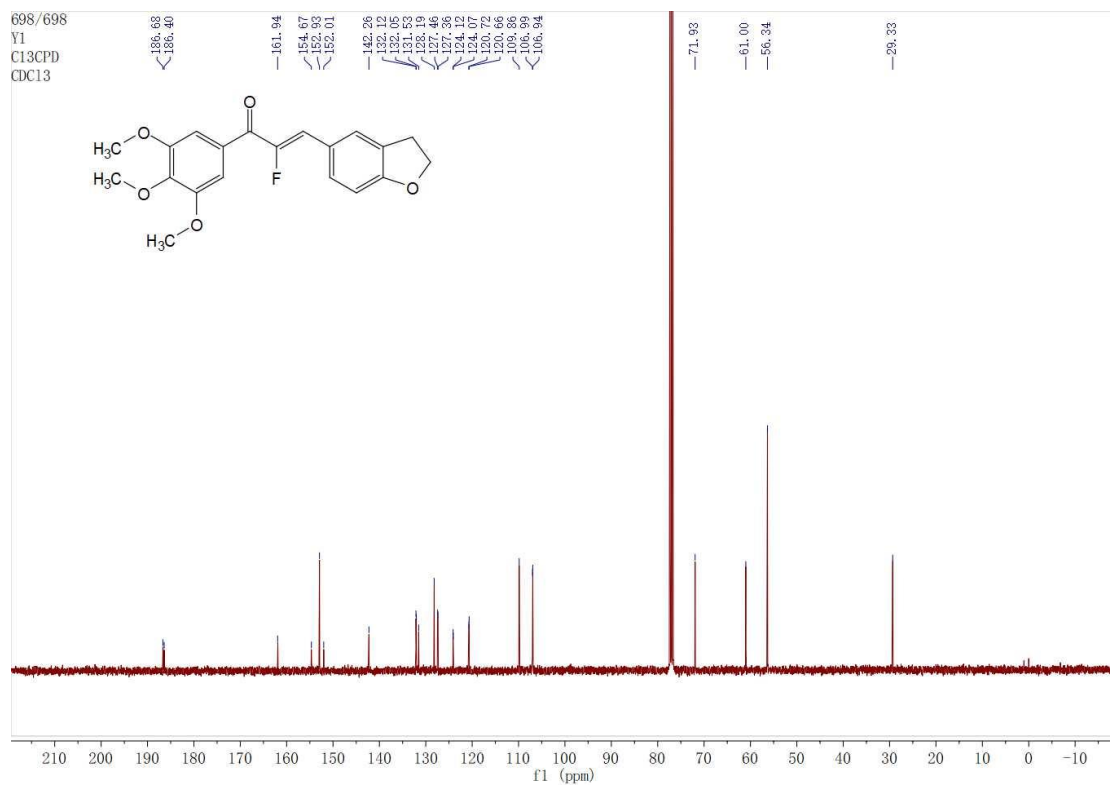



# $^{13}\text{C}$ NMR of **4n**

C:\Users\...ShaoYL-22\_210319172042

3/19/2021 5:20:42 PM

SM: 7B

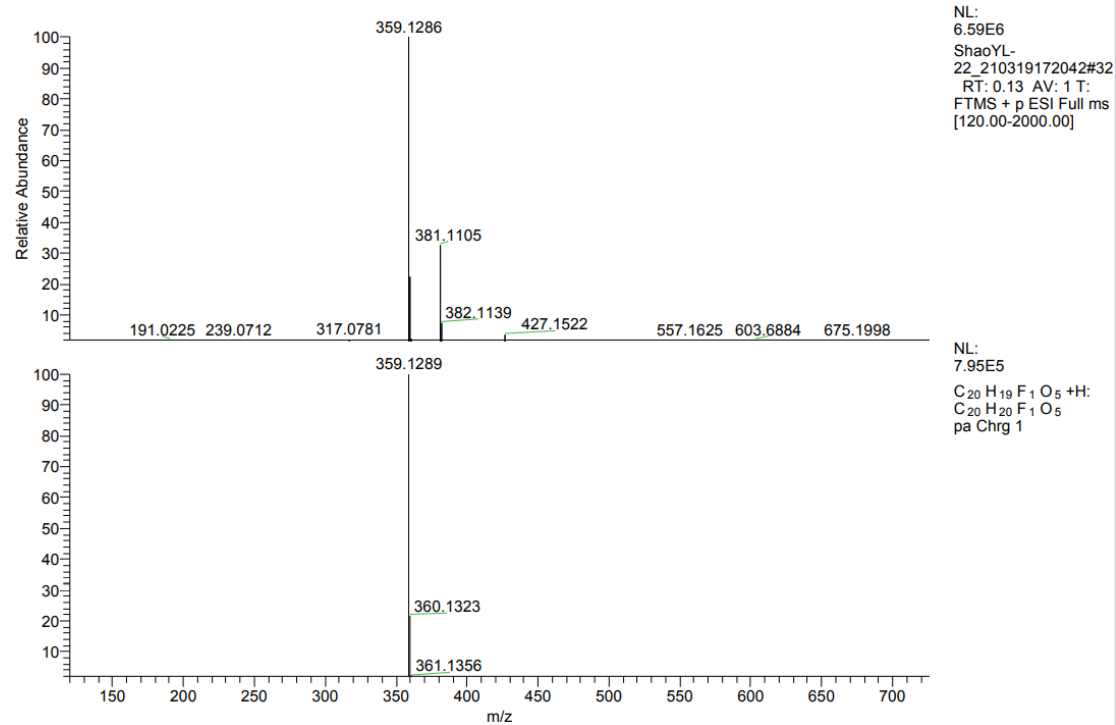

# HRMS of **4n**

# (15) $^1\text{H}$ , $^{13}\text{C}$ NMR and HRMS spectra of **4o**

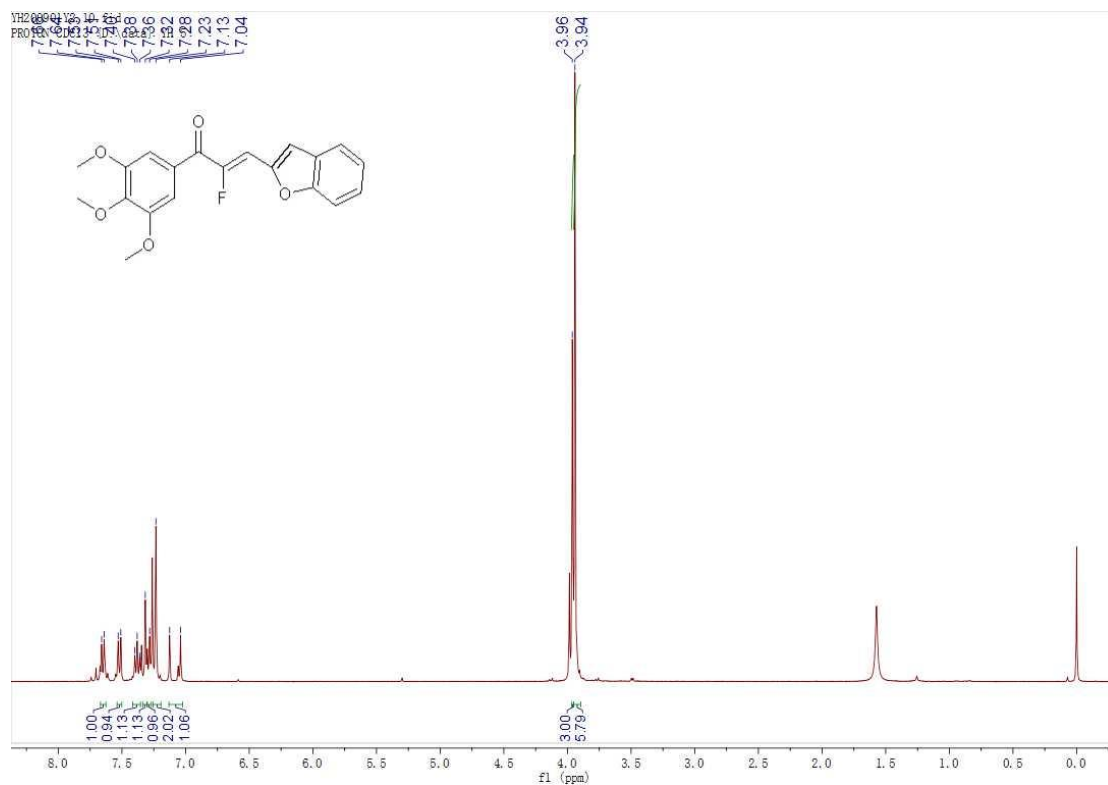

### <sup>1</sup>H NMR of 4o

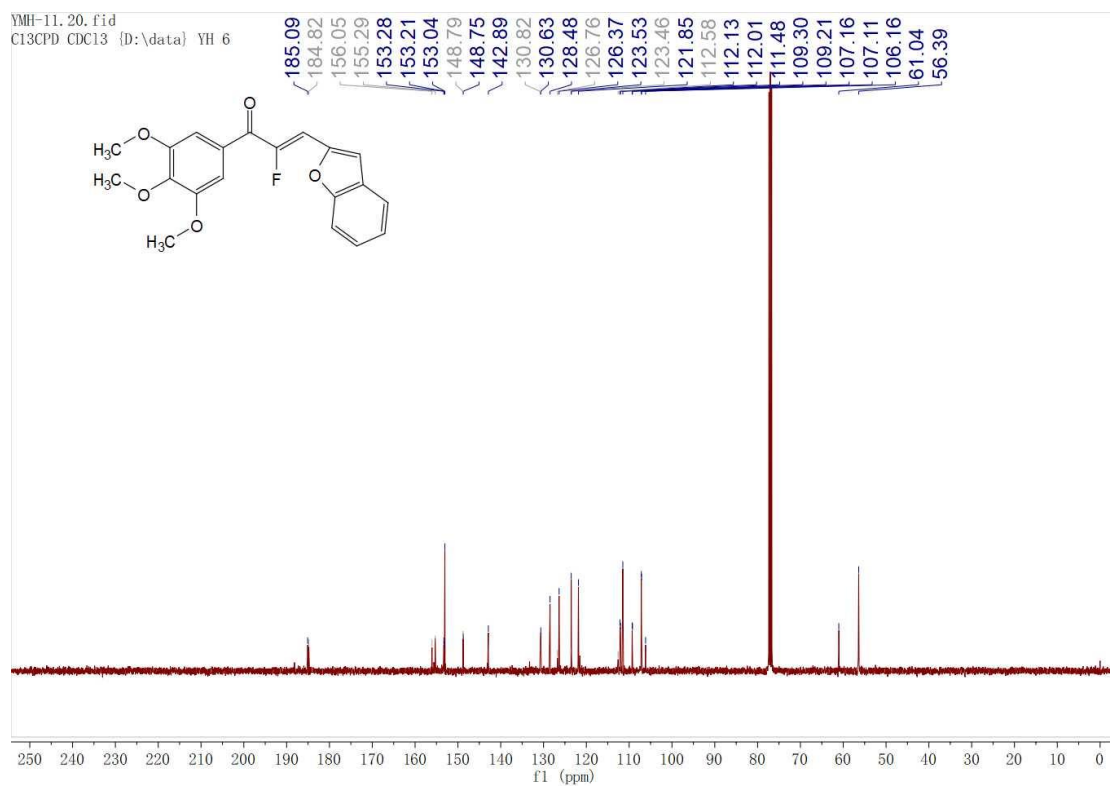

### <sup>13</sup>C NMR of 4o

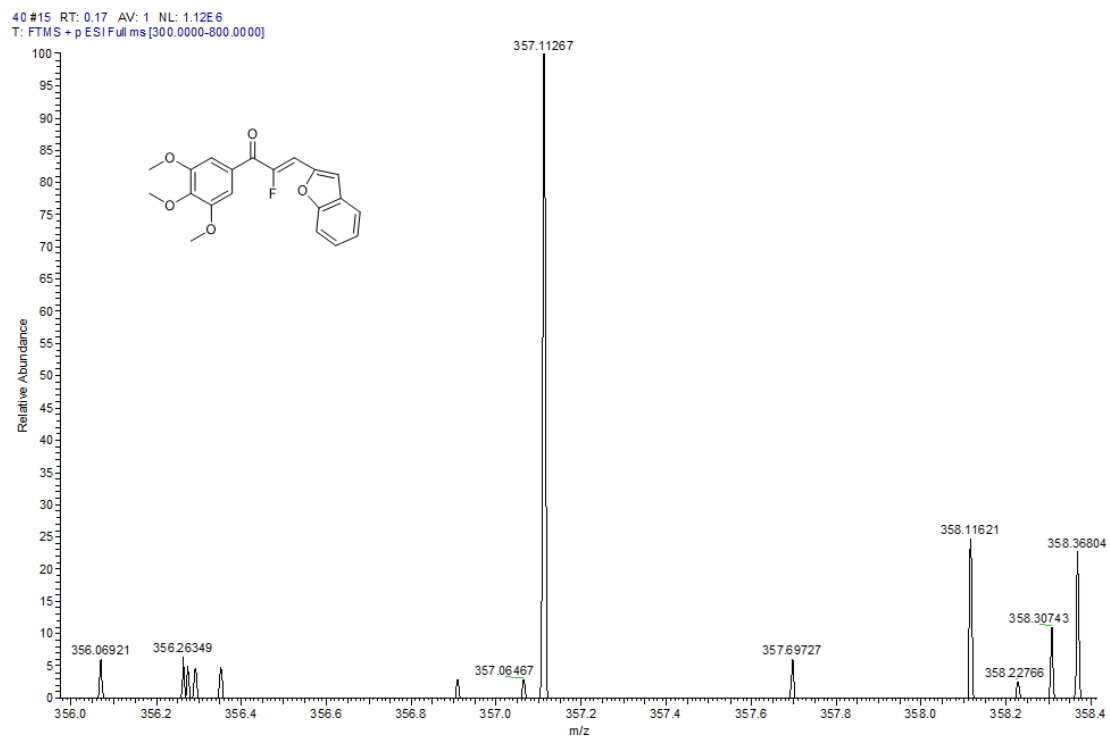

### HRMS of 4o

(16)  $^1\text{H}$ ,  $^{13}\text{C}$  NMR and HRMS spectra of **4p**

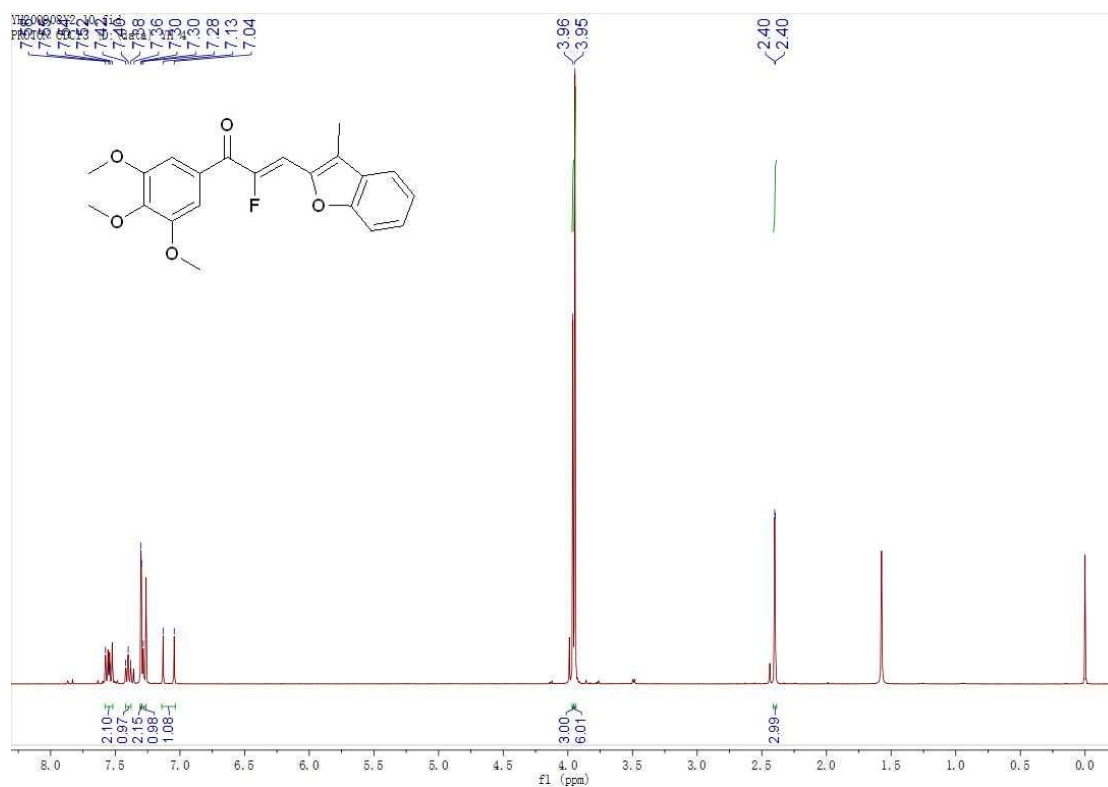

$^1\text{H}$  NMR of **4p**

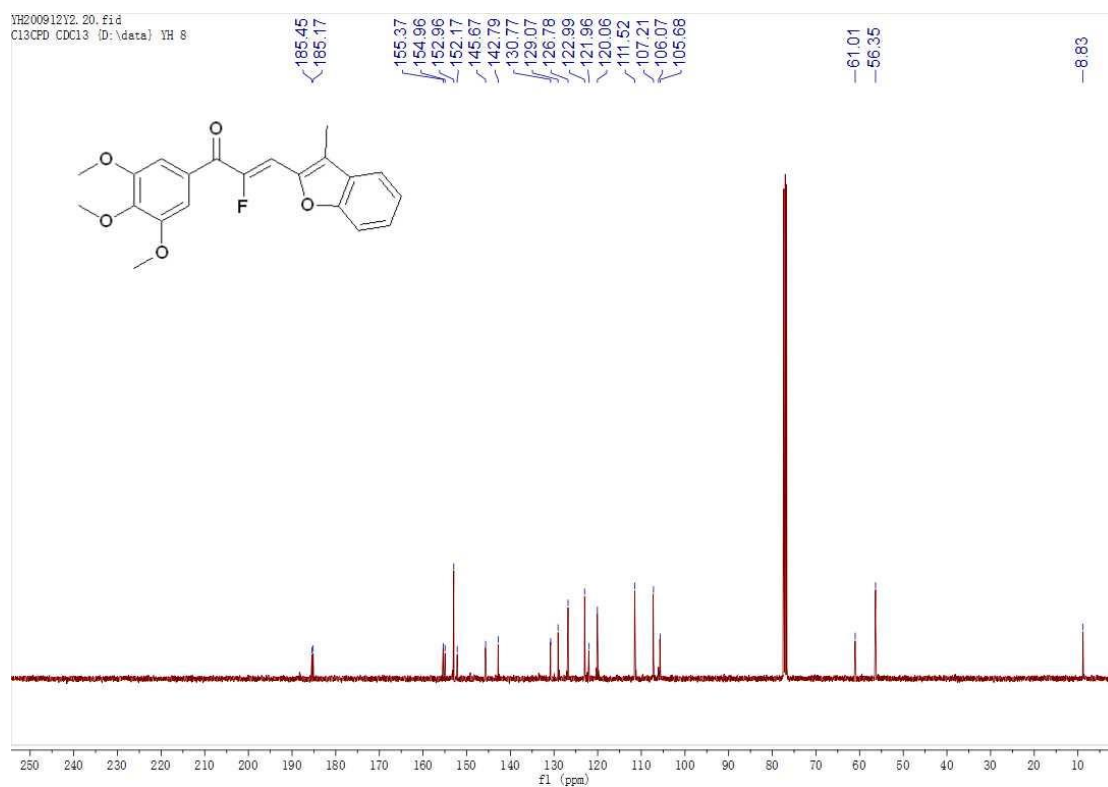

### $^{13}\text{C}$ NMR of **4p**

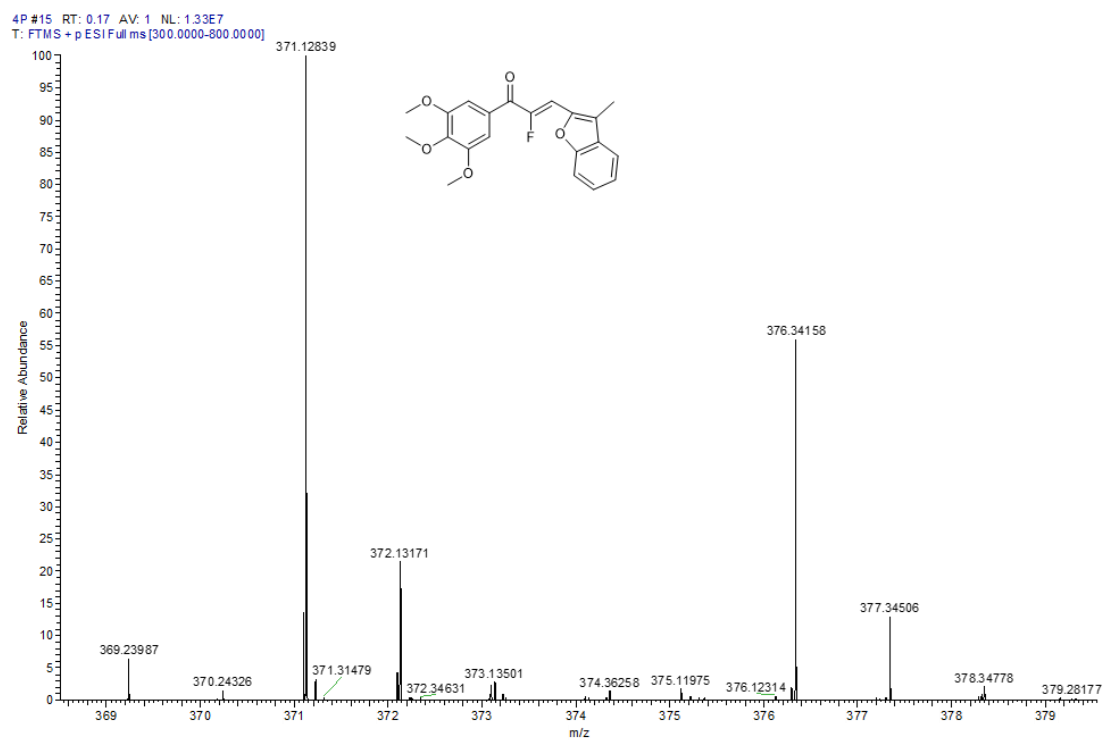

### HRMS of **4p**

(**17**)  $^1\text{H}$ ,  $^{13}\text{C}$  NMR and HRMS spectra of **4q**

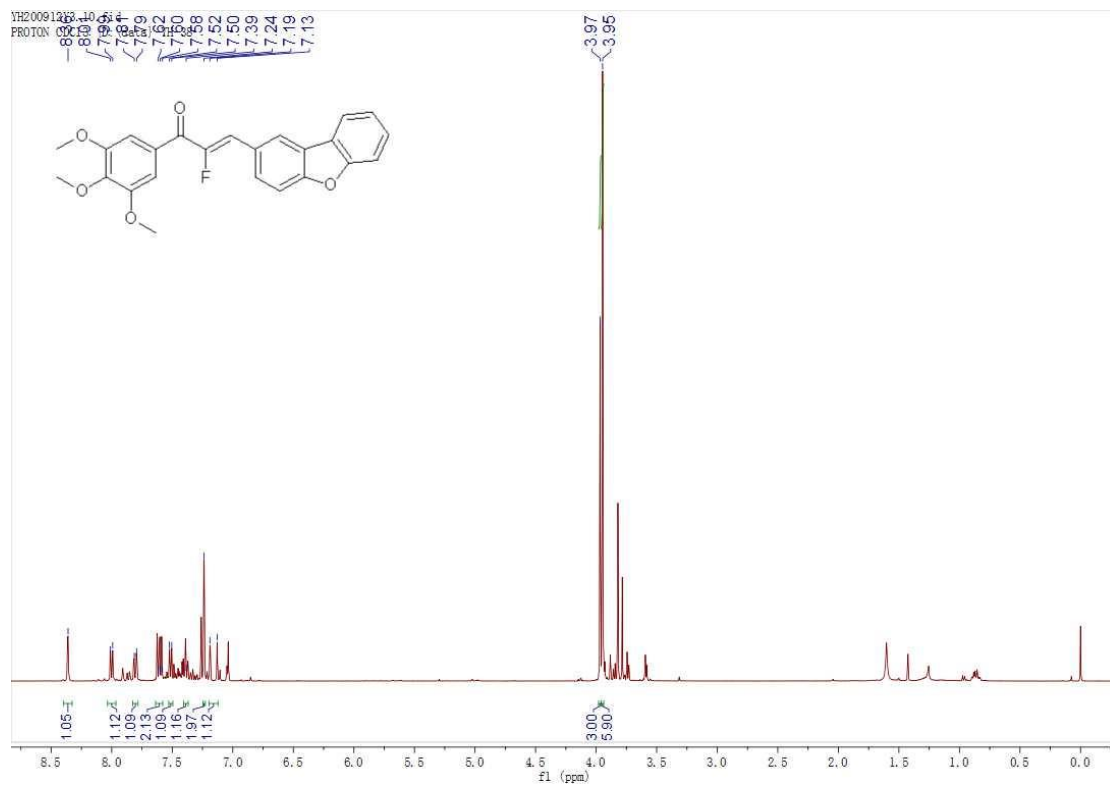

$^1\text{H}$  NMR of **4q**

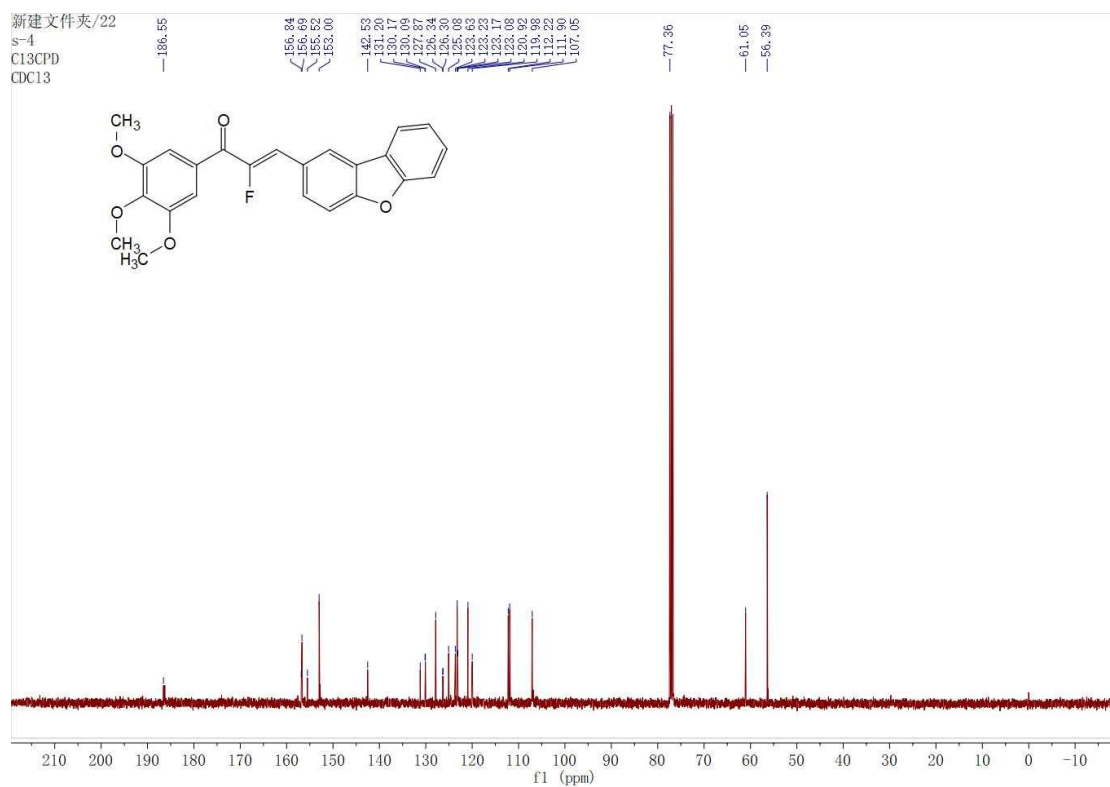

$^{13}\text{C}$  NMR of **4q**

4Q #15 RT: 0.17 AV: 1 NL: 4.93E6  
T: FTMS -p ESI Full ms [300.0000-800.0000]

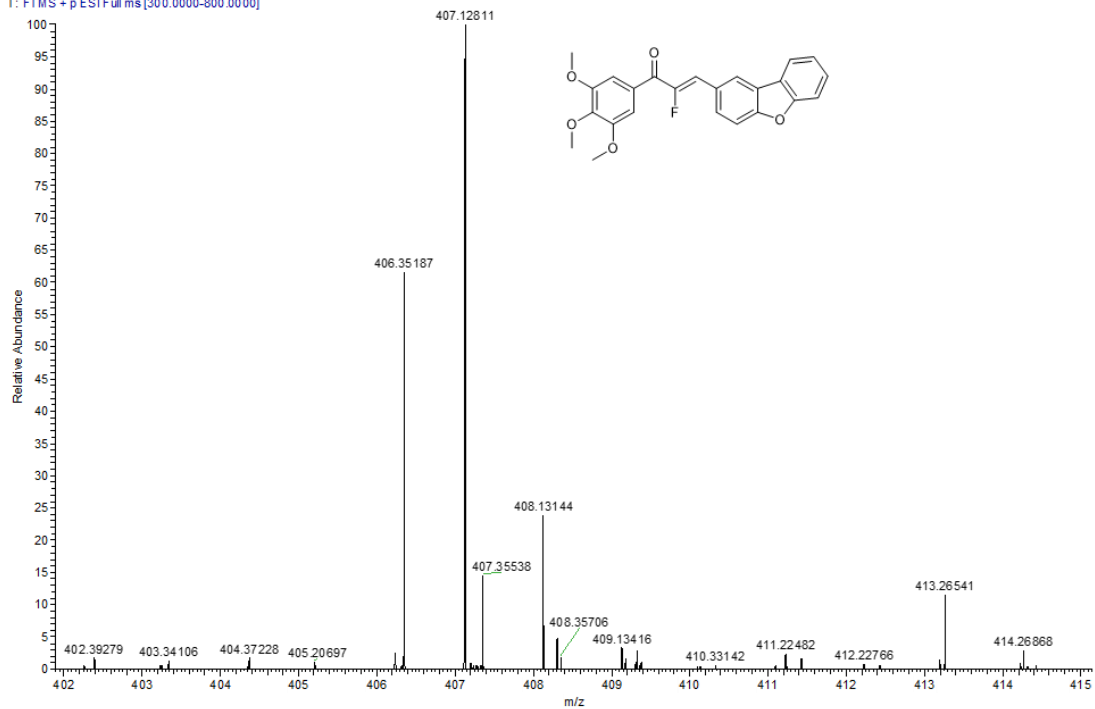

HRMS of **4q**

(**18**)  $^1\text{H}$ ,  $^{13}\text{C}$  NMR and HRMS spectra of **4r**

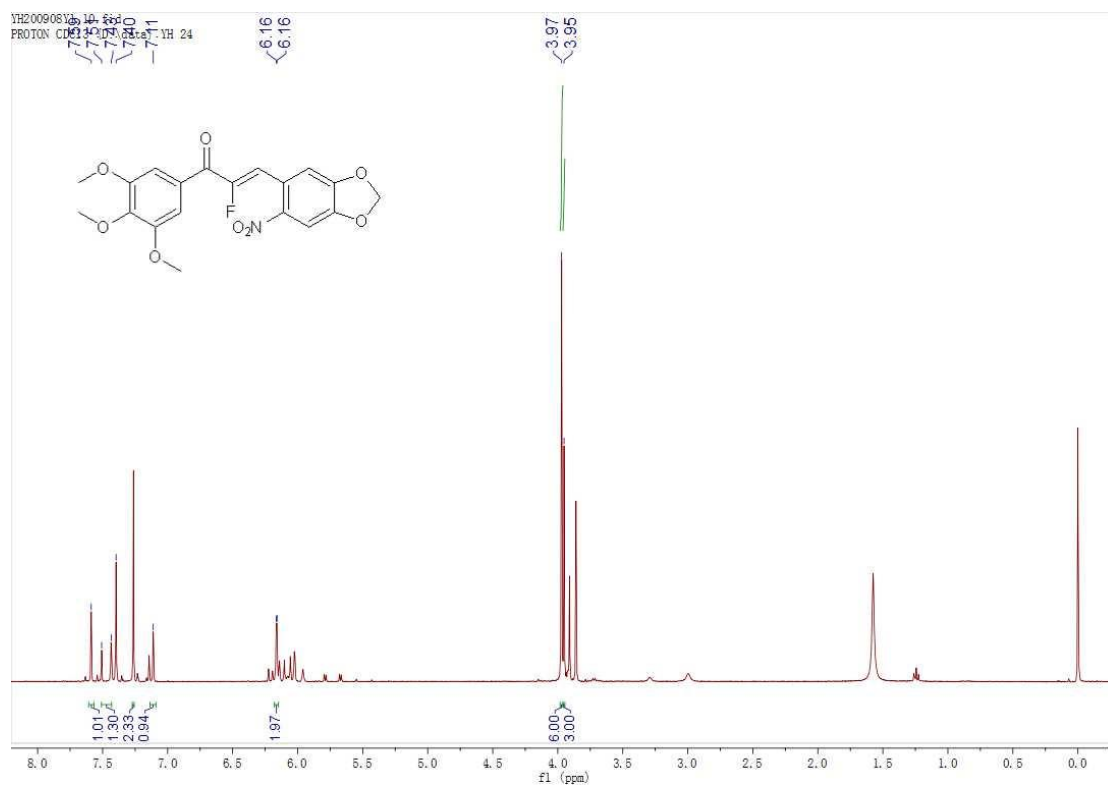

### <sup>1</sup>H NMR of 4r

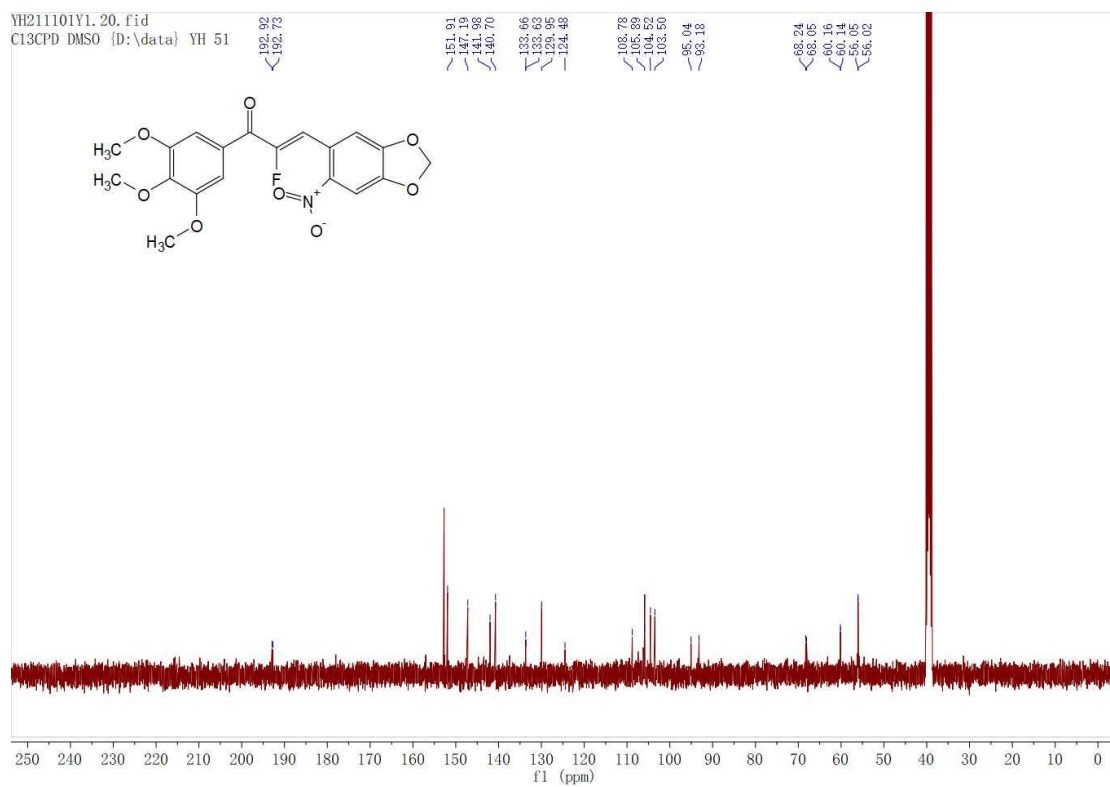

### <sup>13</sup>C NMR of 4r

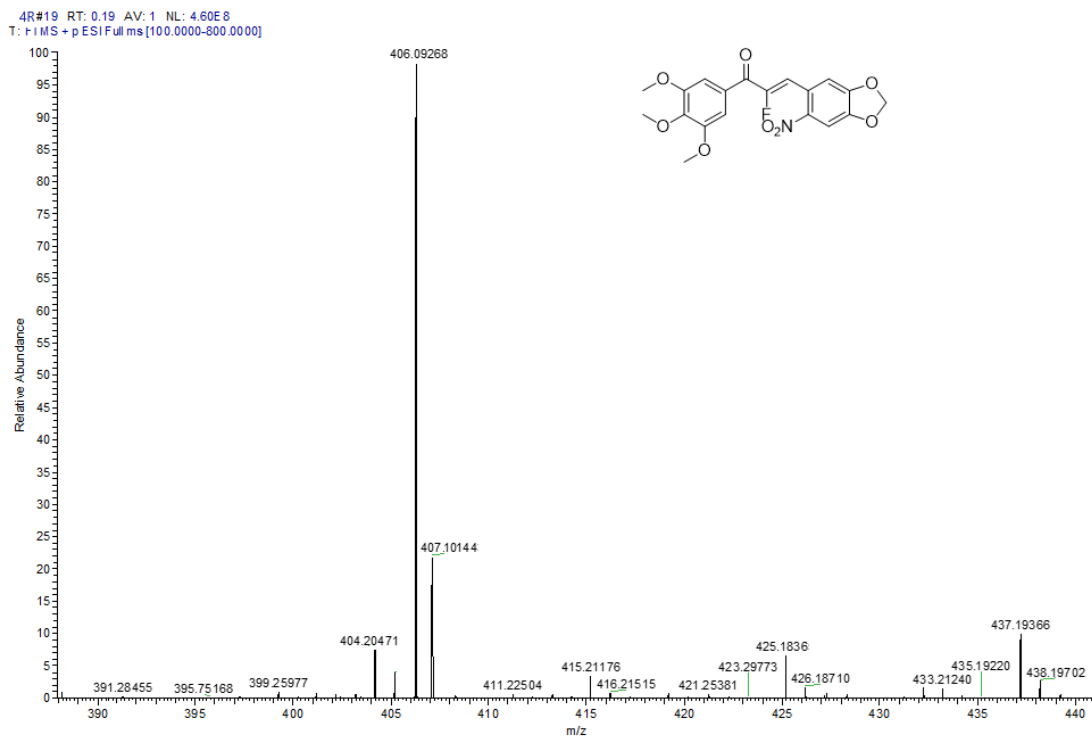

### HRMS of 4r

(19)  $^1\text{H}$ ,  $^{13}\text{C}$  NMR and HRMS spectra of 4s

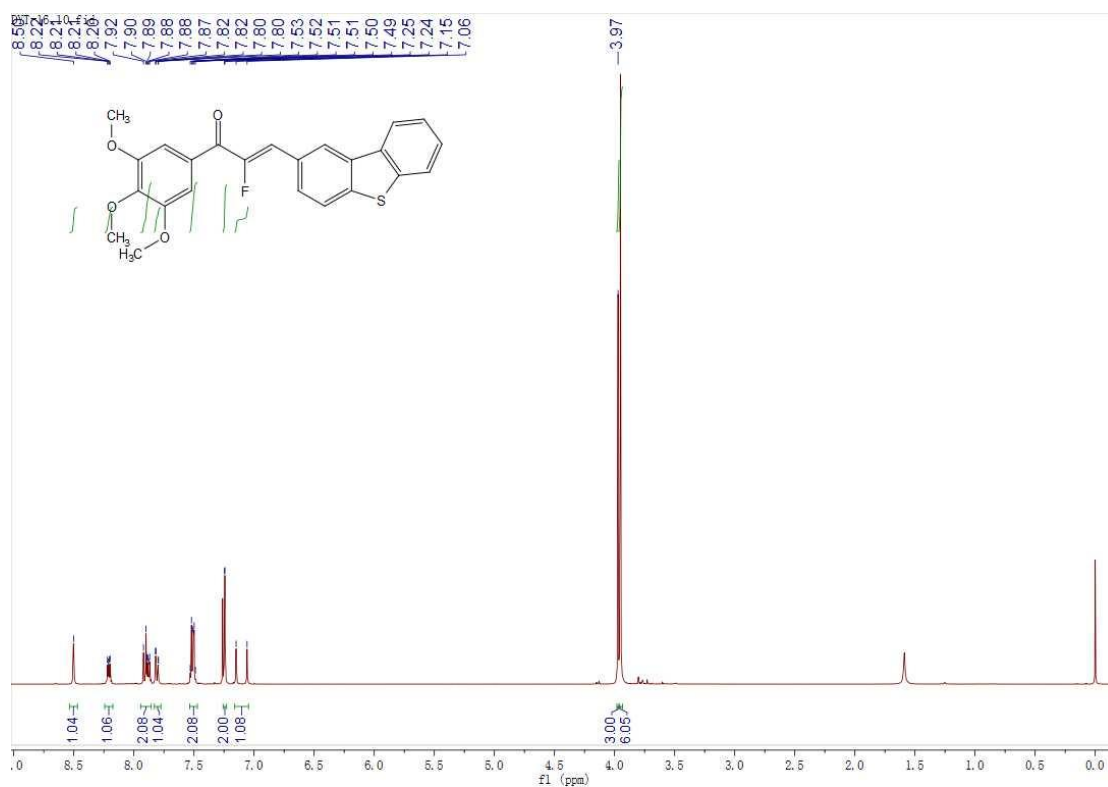

$^1\text{H}$  NMR of 4s

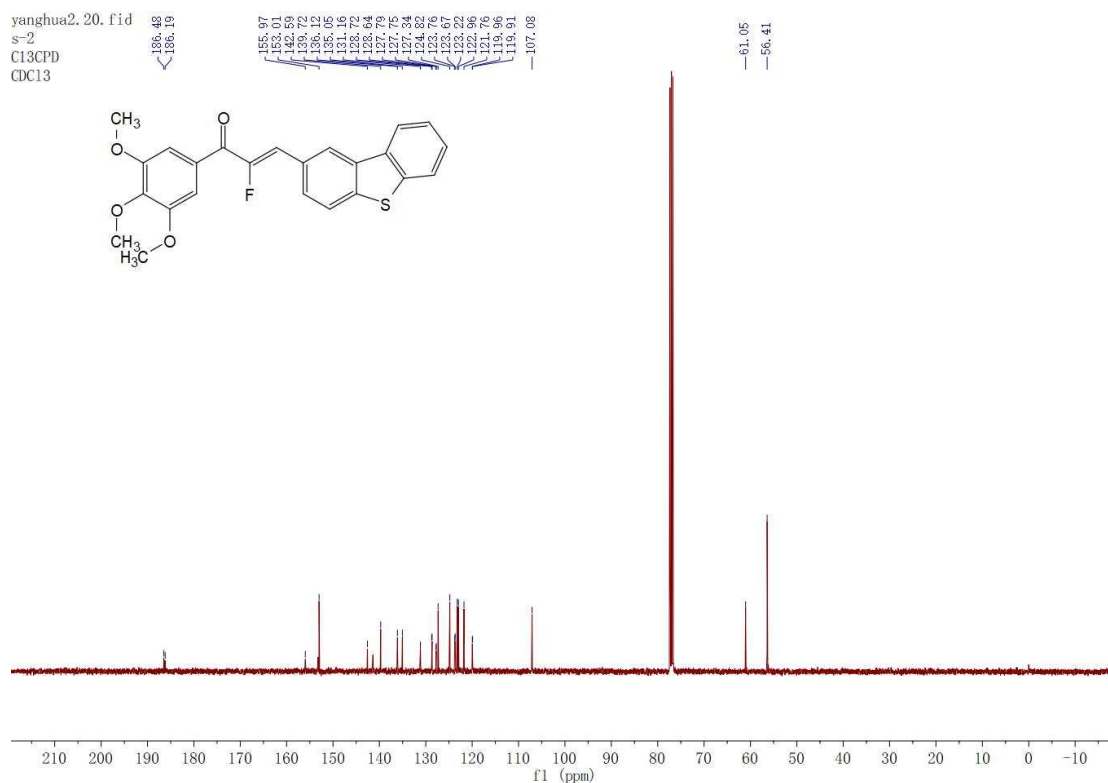



### $^{13}\text{C}$ NMR of **4s**

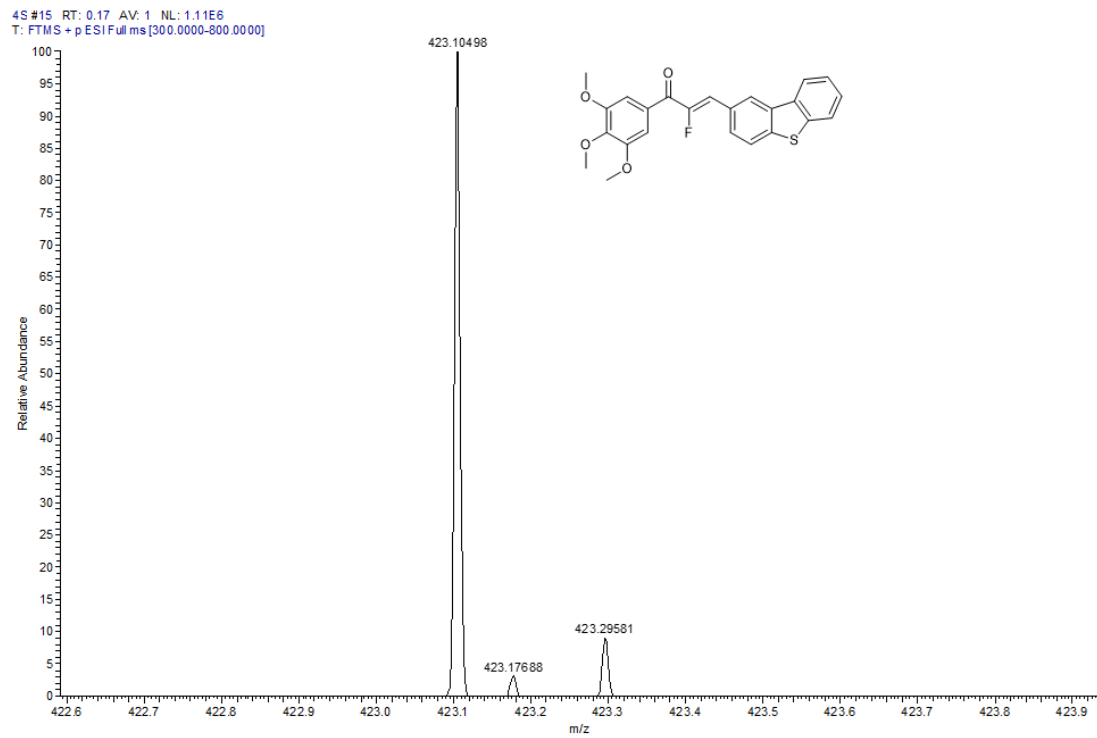

### HRMS of **4s**

### ( $^{20}\text{H}$ , $^{13}\text{C}$ NMR and HRMS spectra of **4t**

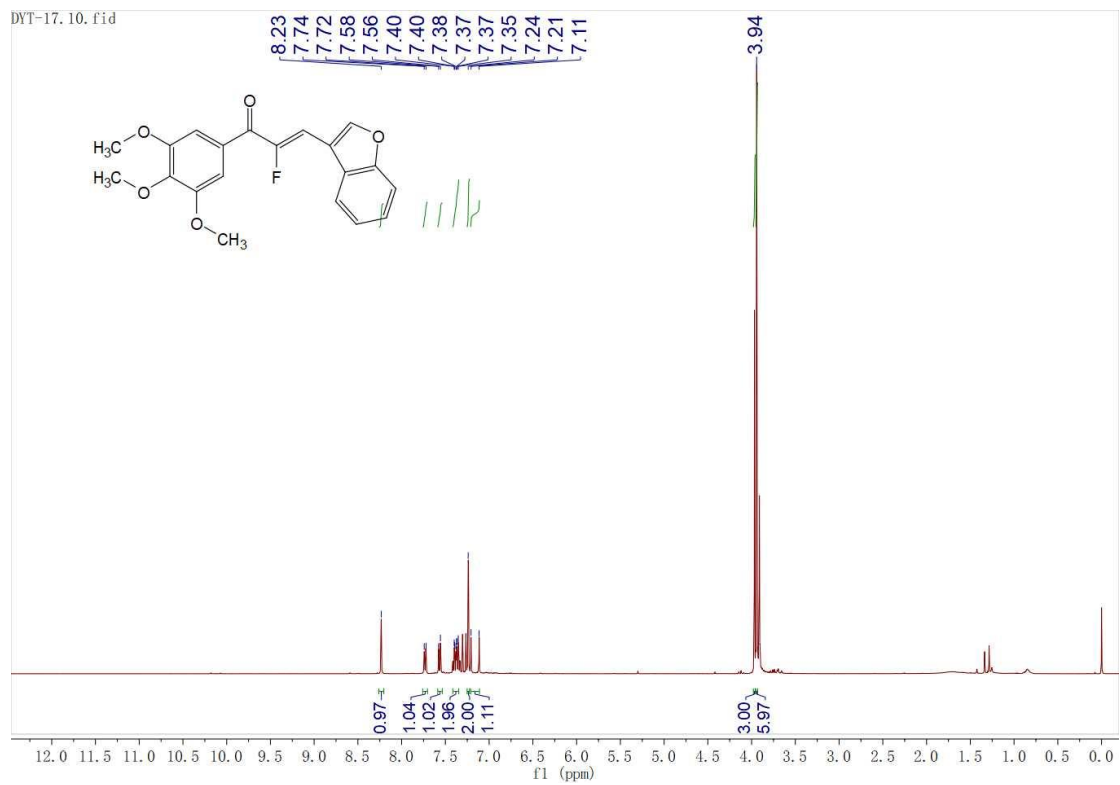

# <sup>1</sup>H NMR of 4t

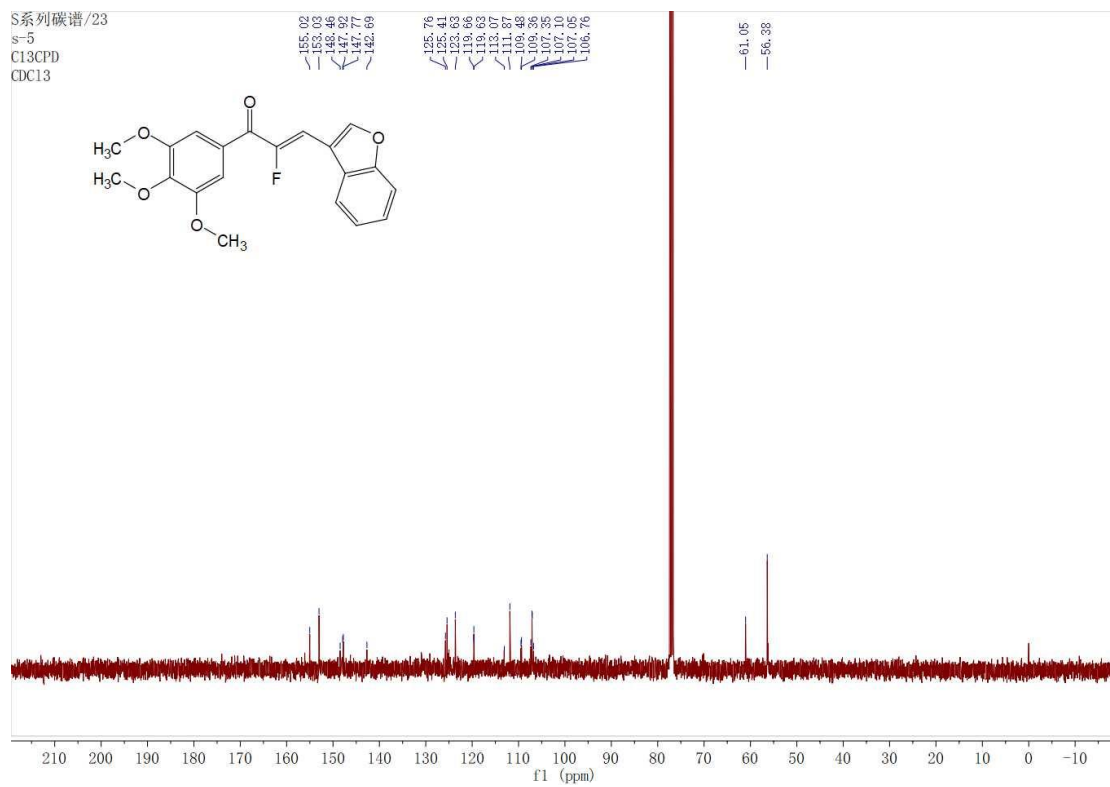

# <sup>13</sup>C NMR of 4t

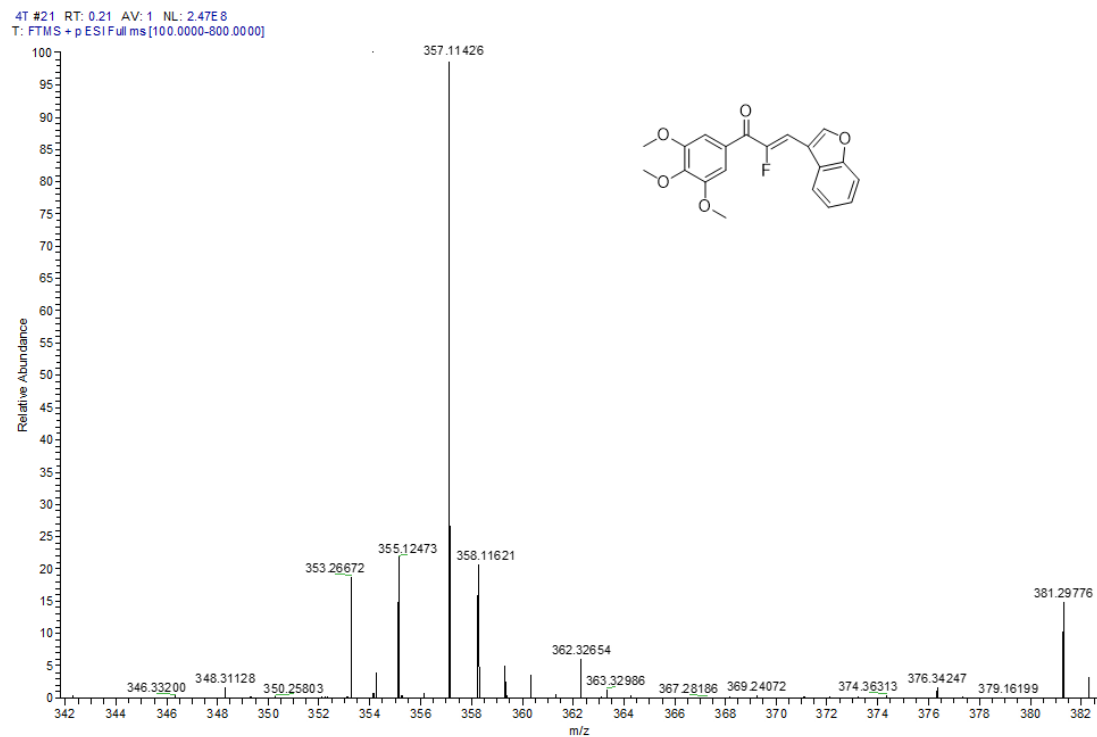

2. Cell arrest western blot assays films of compound 4c(48h)

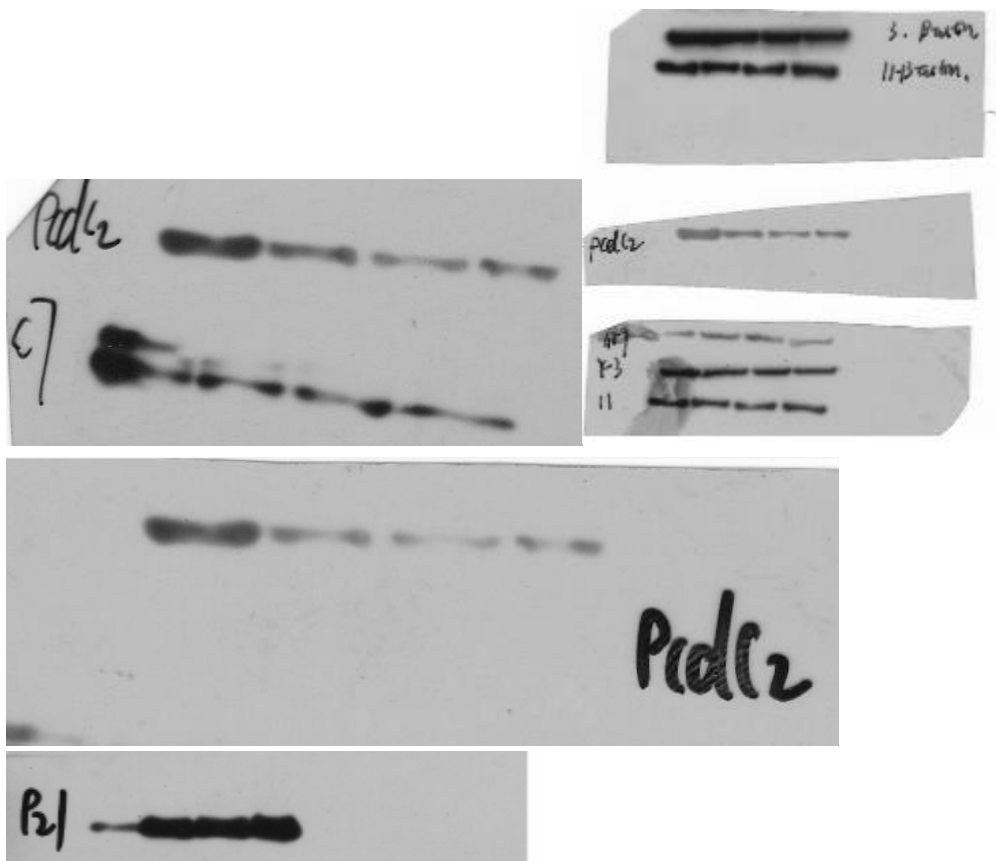

3. Cell apoptosis western blot assays films of compound 7m

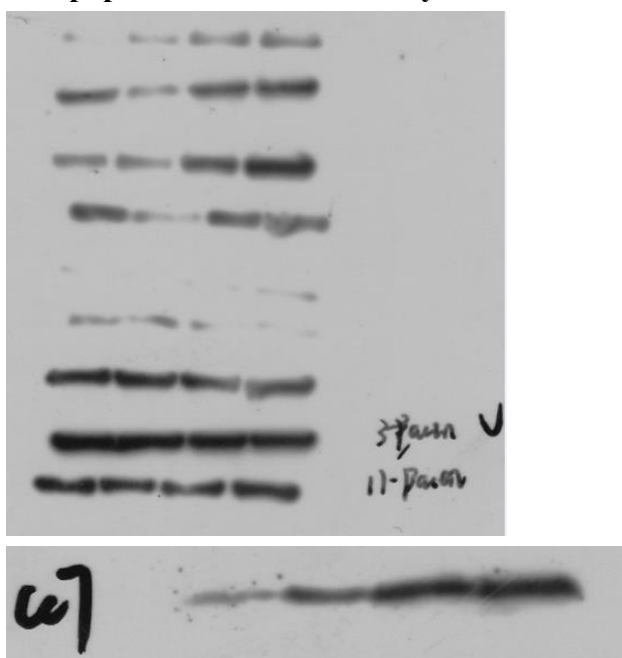

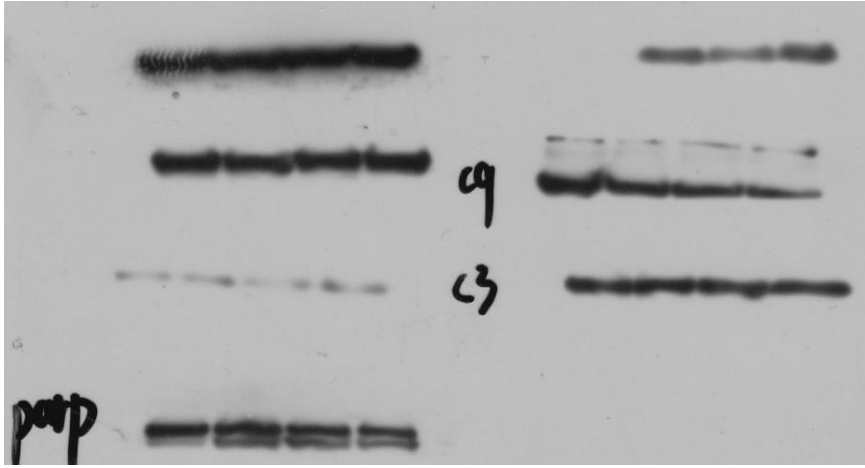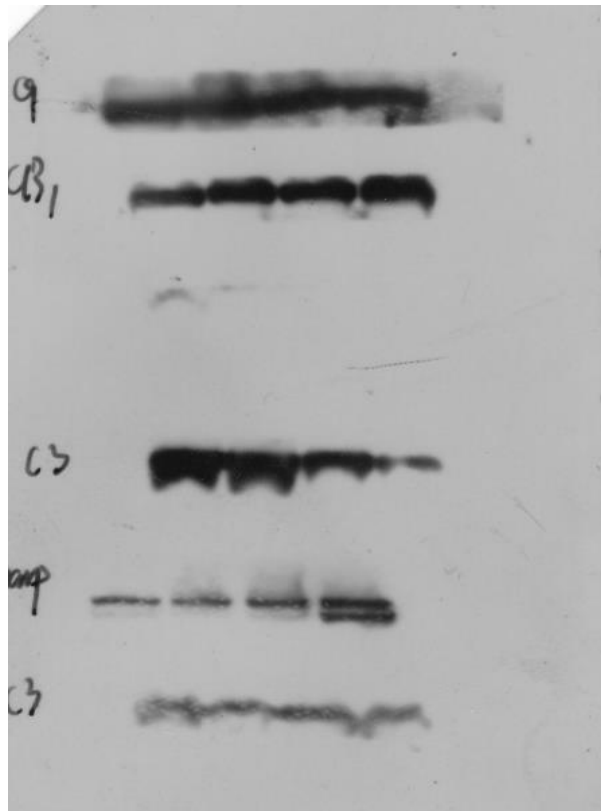

Supplement: IENZ_A_2014831_SM9286.pdf [file IENZ_A_2014831_SM9286.pdf]
